# Supplementary material for: Proton reduction by a nickel complex with an internal quinoline moiety for proton relay
Source: Royal Society of Chemistry journal article supplement (doi:10.1039/c6cp03034c), 2016-01-01
Supplement: c6cp03034c1.pdf [file c6cp03034c1.pdf]

## Proton Reduction by a Nickel Complex with Internal Quinoline Moiety for Proton-Relay

Karunamay Majee,<sup>[a]</sup> Jully Patel,<sup>[a]</sup> Surabhi Rai,<sup>[a]</sup> Babulal Das,<sup>[b]</sup> Binata Panda,<sup>[c]</sup>  
and Sumanta Kumar Padhi \*,<sup>[a]</sup>

<sup>a</sup> Artificial Photosynthesis Lab, Department of Applied Chemistry, Indian School of Mines,  
Dhanbad, 826004, Jharkhand, India

<sup>b</sup> Department of Chemistry, Indian Institute of Technology Guwahati, Assam, 781039, India

<sup>c</sup> String Theory Lab, Department of Applied Physics, Indian School of Mines, Dhanbad,  
826004, Jharkhand, India

\*E-mails: [padhi.sk.ac@ismdhanbad.ac.in](mailto:padhi.sk.ac@ismdhanbad.ac.in)

**Supporting Information**

| <b>Table of Contents</b>                                                                                                                    |                 |
|---------------------------------------------------------------------------------------------------------------------------------------------|-----------------|
| <b>Index</b>                                                                                                                                | <b>Page No.</b> |
| <b>Figure S1.</b> IR Spectra of the Ligand <b>DQPDH<sub>2</sub></b> .                                                                       | 2               |
| <b>Figure S2.</b> <sup>1</sup> H NMR of <b>DQPDH<sub>2</sub></b> in CDCl <sub>3</sub>                                                       | 2               |
| <b>Figure S3.</b> <sup>13</sup> C NMR of <b>DQPDH<sub>2</sub></b> in CDCl <sub>3</sub> .                                                    | 3               |
| <b>Figure S4.</b> The UV-Vis spectrum of the 0.1 mM <b>DQPDH<sub>2</sub></b> ligand and <b>Ni(DQPD)</b> .                                   | 3               |
| <b>Figure S5.</b> <sup>1</sup> H NMR of <b>Ni(DQPD)</b> complex in DMSO-D <sub>6</sub> .                                                    | 4               |
| <b>Figure S6.</b> <sup>1</sup> H NMR of <b>Ni(DQPD)</b> complex in DMSO-D <sub>6</sub> in presence of acetic acid.                          | 5               |
| <b>Figure S7.</b> The fluorescence quenching of fluorescein by <b>Ni(DQPD)</b> complex.                                                     | 5               |
| <b>Figure S8.</b> Stern-Volmer plot of the emission quenching of fluorescein.                                                               | 6               |
| <b>Figure S9.</b> Rate of Hydrogen production with varied concentration of <b>Ni(DQPD)</b> complex.                                         | 6               |
| <b>Figure S10.</b> Rate of Hydrogen production with varied concentration of fluorescein.                                                    | 7               |
| <b>Figure S11.</b> Hydrogen evolution in presence of complex and in blank solution.                                                         | 7               |
| <b>Figure S12.</b> Hydrogen evolution in presence of light and in under dark condition.                                                     | 8               |
| <b>Figure S13.</b> Photo-degradation of fluorescein.                                                                                        | 8               |
| <b>Figure S14.</b> H <sub>2</sub> evolution after 25 h of the irradiation with the addition of FI or <b>Ni(DQOD)</b> .                      | 9               |
| <b>Figure S15.</b> Rate of Hydrogen production at varied temperature.                                                                       | 9               |
| <b>Figure S16.</b> Eyring-Polanyi plot of Hydrogen evolution.                                                                               | 10              |
| <b>Figure S17.</b> Arrhenius plot of Hydrogen evolution.                                                                                    | 10              |
| <b>Figure S18.</b> CV of 1.0 mM <b>DQPDH<sub>2</sub></b> in DMF.                                                                            | 11              |
| <b>Figure S19.</b> CV of 1.0 mM <b>DQPDH<sub>2</sub></b> in DMF after addition of NaH.                                                      | 11              |
| <b>Figure S20.</b> CV of <b>Ni(DQPD)</b> complex prepared <i>in situ</i> from.                                                              | 12              |
| <b>Figure S21.</b> CV of 1.0 mM isolated <b>Ni(DQPD)</b> complex in DMF                                                                     | 12              |
| <b>Figure S22.</b> CV of 1.0 mM isolated <b>Ni(DQPD)</b> complex in presence one equiv. of AcOH.                                            | 13              |
| <b>Figure S23.</b> The electron density in ( <b>1</b> ) and ( <b>1a</b> ).                                                                  | 13              |
| <b>Figure S24.</b> CV of 0.5 mM <b>Ni(DQPD)</b> in the presence of varying concentrations of CH <sub>3</sub> COOH.                          | 14              |
| <b>Figure S25.</b> CV of 1.0 mM <b>Ni(DQPD)</b> in the presence of varying concentrations of CH <sub>3</sub> COOH.                          | 14              |
| <b>Figure S26.</b> CV of 1.5 mM <b>Ni(DQPD)</b> in the presence of varying concentrations of CH <sub>3</sub> COOH.                          | 15              |
| <b>Figure S27.</b> Cyclic voltammograms of 1.0 mM <b>Ni(DQPD)</b> complex at varying scan rates.                                            | 15              |
| <b>Figure S28.</b> Peak current ( <i>i<sub>p</sub></i> ) vs. square root of scan rate ( <i>v</i> <sup>1/2</sup> ) with linear fitted slope. | 16              |
| <b>Figure S29.</b> Catalytic current elevation from CV of 1.5 mM <b>Ni(DQPD)</b> at varying scan rate.                                      | 16              |
| <b>Figure S30.</b> The UV-Vis spectrum of the 0.05 mM <b>Ni(DQPD)</b> with addition of 15 equiv. of AcOH.                                   | 17              |
| <b>Figure S31.</b> Dependence of catalytic current, <i>i<sub>c</sub></i> , on metal and acid concentration.                                 | 17              |
| <b>Figure S32.</b> Dependence of catalytic current, <i>i<sub>c</sub>/i<sub>p</sub></i> , on acetic acid concentration.                      | 18              |
| <b>Figure S33.</b> Optimized structure of <b>Ni(DQPD)</b> .                                                                                 | 18              |
| <b>Figure S34.</b> Optimized structure of <b>1</b> generated after protonation of <b>Ni(DQPD)</b> .                                         | 19              |
| <b>Figure S35.</b> Optimized structure of <b>1a</b> generated after one electron reduction of <b>1</b> .                                    | 19              |
| <b>Figure S36.</b> Optimized structure of <b>2a</b> after 1 e <sup>-</sup> reduction of <b>Ni(DQPD)</b> followed by protonation.            | 20              |
| <b>Figure S37.</b> Optimized structure of <b>1b</b> generated after protonation of <b>1a</b> .                                              | 20              |
| <b>Figure S38.</b> Optimized structure of <b>1c</b> generated after one electron reduction of <b>1b</b> .                                   | 21              |
| <b>Figure S39.</b> The transition state <b>TS1</b> identified by STQN calculation.                                                          | 21              |
| <b>Figure S40.</b> The structure of the intermediate.                                                                                       | 22              |
| <b>Figure S41.</b> The transition state <b>TS2</b> identified by STQN calculation.                                                          | 22              |
| <b>Table S1.</b> Crystal Data and Refinement Parameters of <b>Ni(DQPD)·H<sub>2</sub>O</b> .                                                 | 23              |
| <b>Table S2-S10.</b> XYZ coordinates of computed structures                                                                                 | 23-44           |
| <b>Table S11.</b> Selected bond distances (Å) and angles (°) in optimized <b>Ni(DQPD)·H<sub>2</sub>O</b> .                                  | 45              |
| <b>Table S12.</b> Selected bond distances (Å) and angles (°) in <b>Ni(DQPD)</b> .                                                           | 45              |
| <b>Table S13.</b> Selected bond distances (Å) and angles (°) in optimized <b>1</b> .                                                        | 45              |
| <b>Table S14.</b> Selected bond distances (Å) and angles (°) in optimized <b>1a</b> .                                                       | 46              |
| <b>Table S15.</b> Selected bond distances (Å) and angles (°) in optimized <b>1b</b> .                                                       | 46              |
| <b>Table S16.</b> Selected bond distances (Å) and angles (°) in optimized <b>1c</b> .                                                       | 46              |
| <b>Table S17.</b> Selected bond distances (Å) and angles (°) in optimized <b>2a</b> .                                                       | 47              |
| <b>Table S18.</b> Selected bond distances (Å) and angles (°) in the transition state.                                                       | 47              |

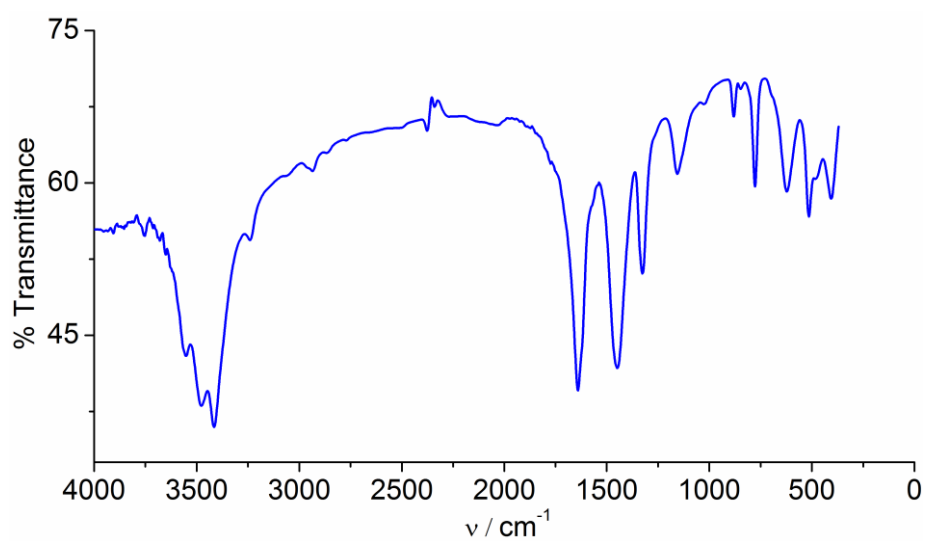

**Figure S1.** IR Spectra of the Ligand DQPDH<sub>2</sub>.

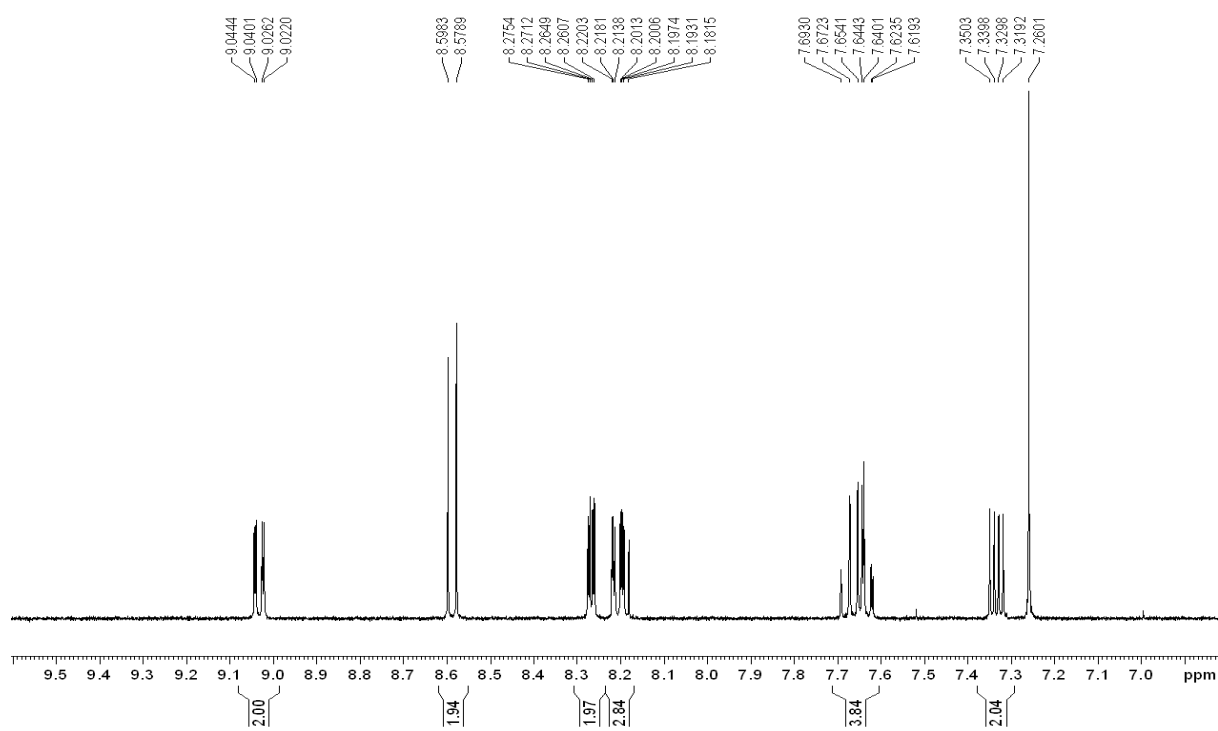

**Figure S2.** <sup>1</sup>H NMR of DQPDH<sub>2</sub> in CDCl<sub>3</sub>.

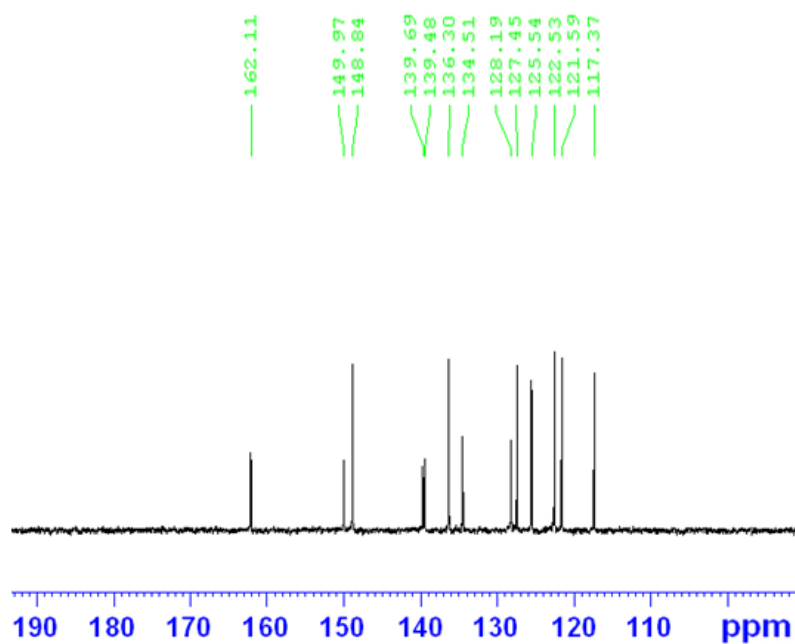

**Figure S3.**  $^{13}\text{C}$  NMR of DQPDH<sub>2</sub> in CDCl<sub>3</sub>.

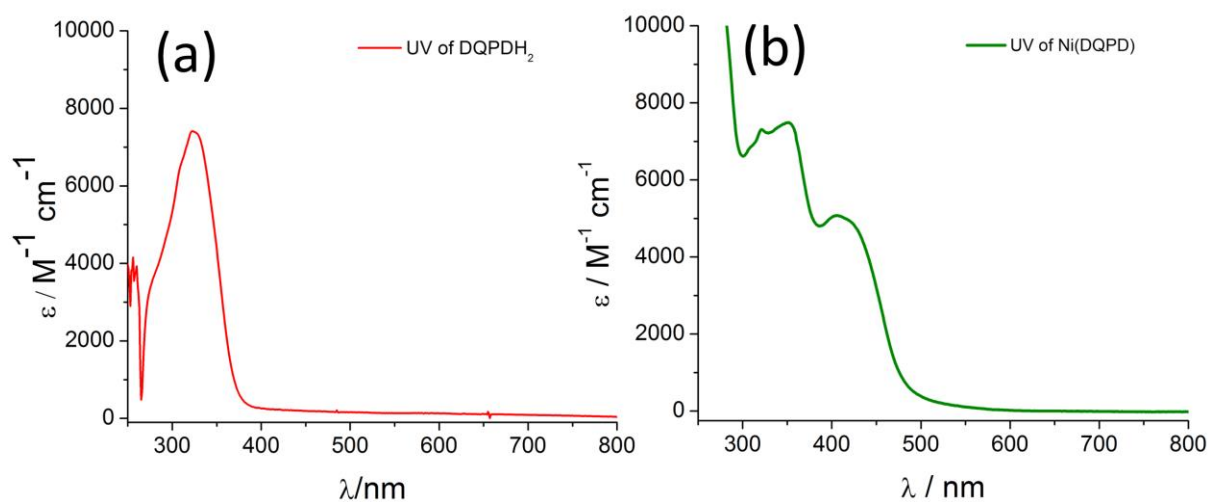

**Figure S4.** The UV-Visible spectrum of 0.1 mM (a) **DQPDH<sub>2</sub>** ligand and (b) **Ni(DQPD)** complex in DMF/H<sub>2</sub>O (95:5, v/v).

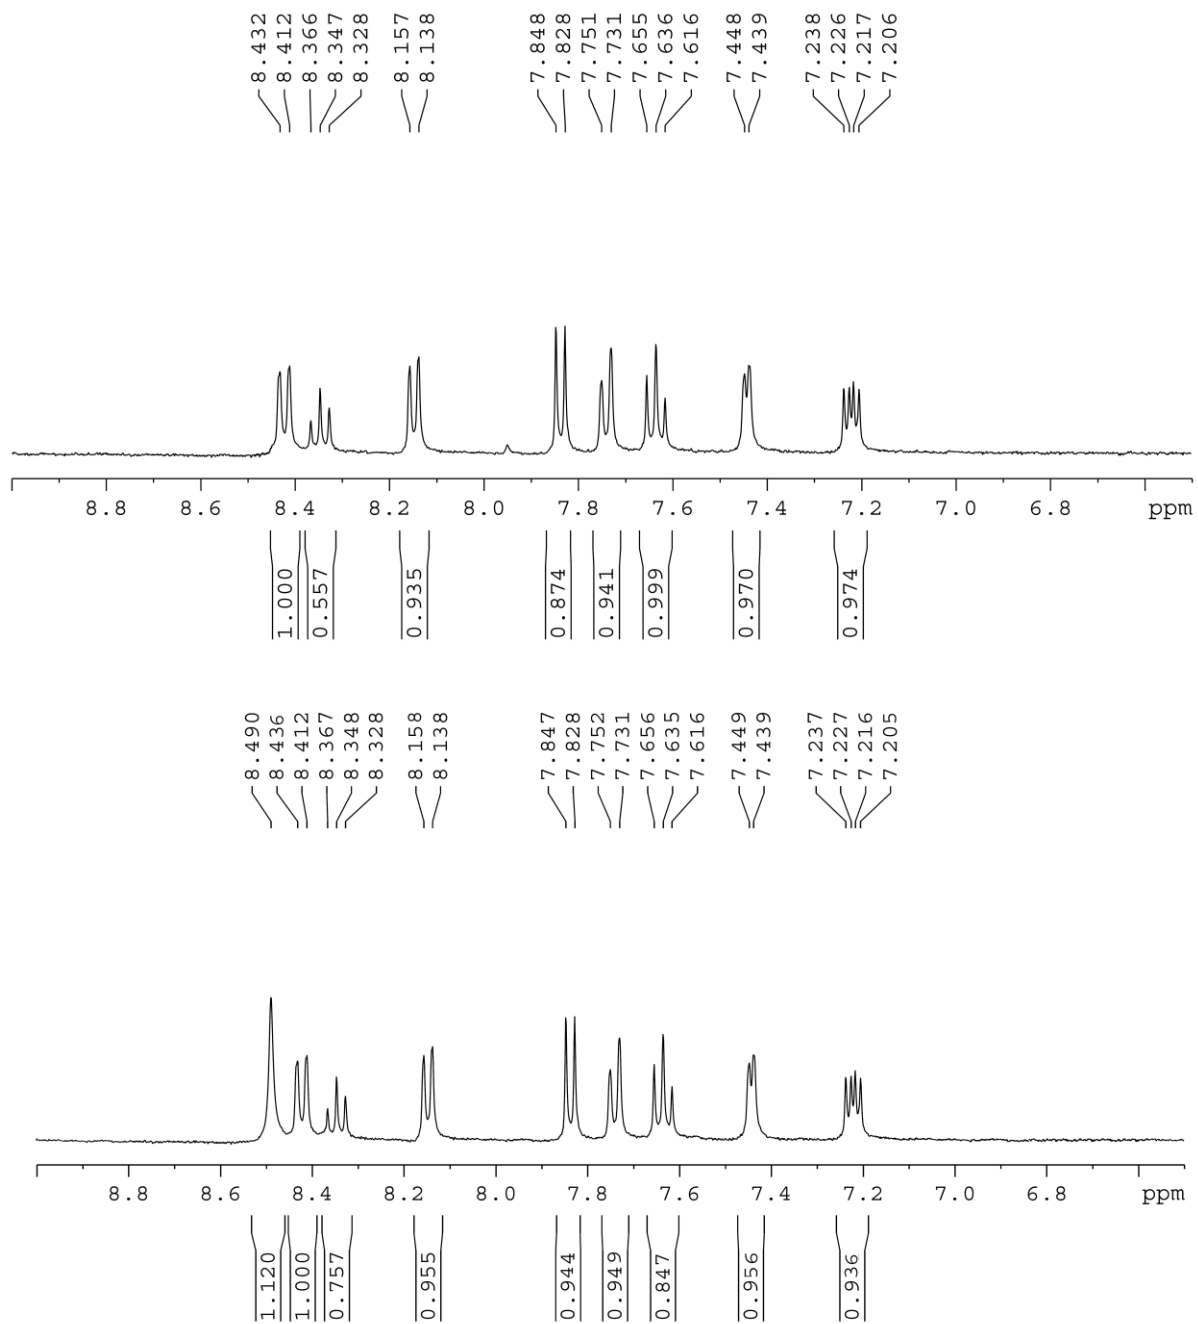

**Figure S5.**  $^1\text{H}$  NMR of Ni(DQPD) (top) and Ni(DQPDH) (bottom) complex in DMSO- $\text{D}_6$ .

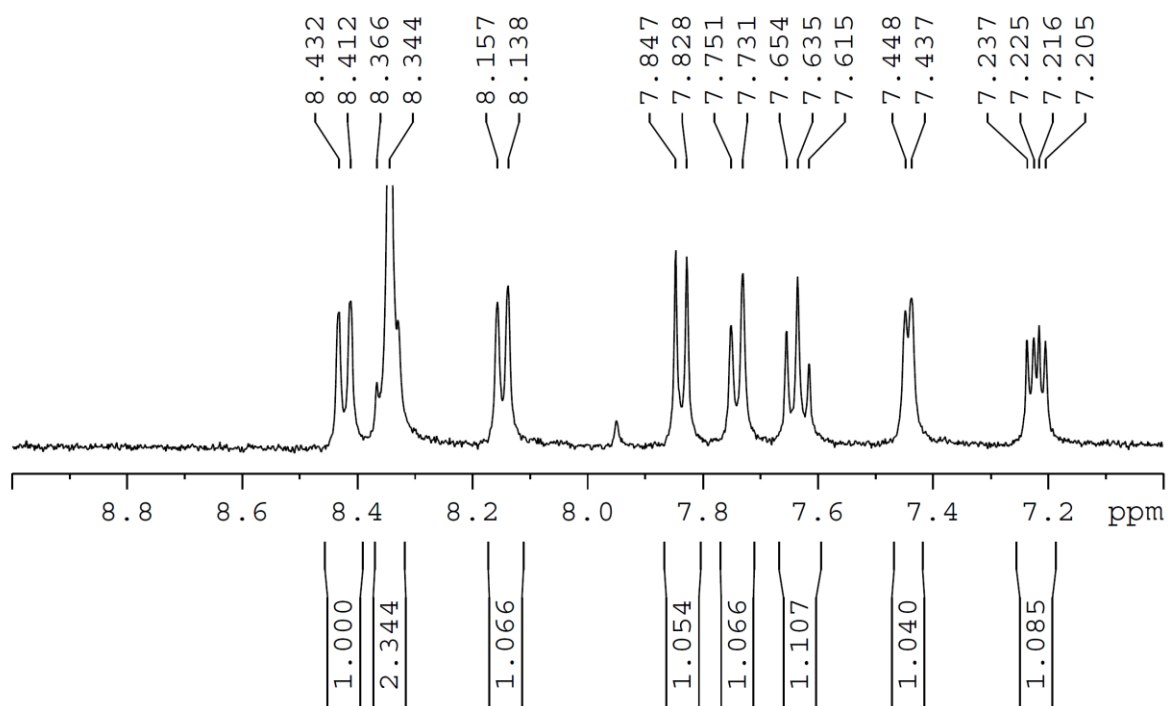

**Figure S6.**  $^1\text{H}$ NMR of **Ni(DQPD)** complex in  $\text{DMSO-D}_6$  in presence of acetic acid.

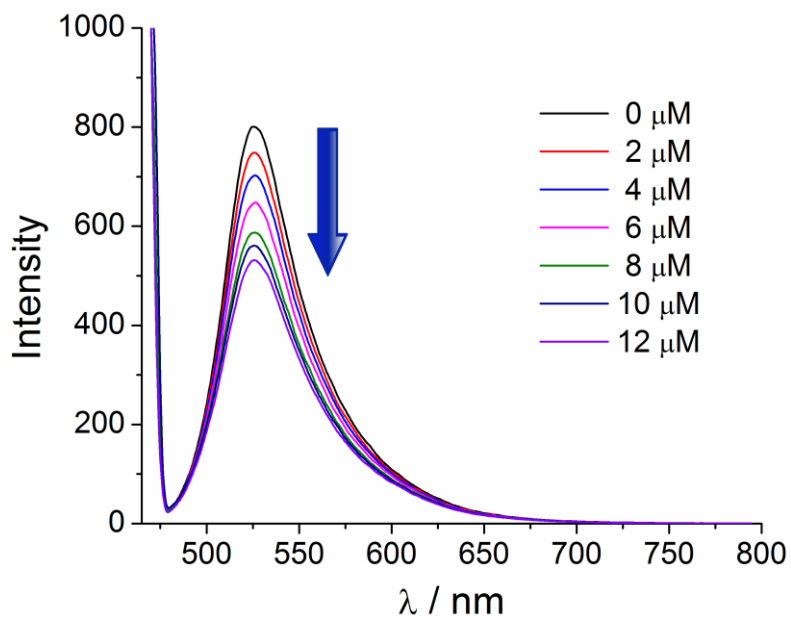

**Figure S7.** The fluorescence quenching of fluorescein by **Ni(DQPD)** complex in 70:30 DMF/ $\text{H}_2\text{O}$ .

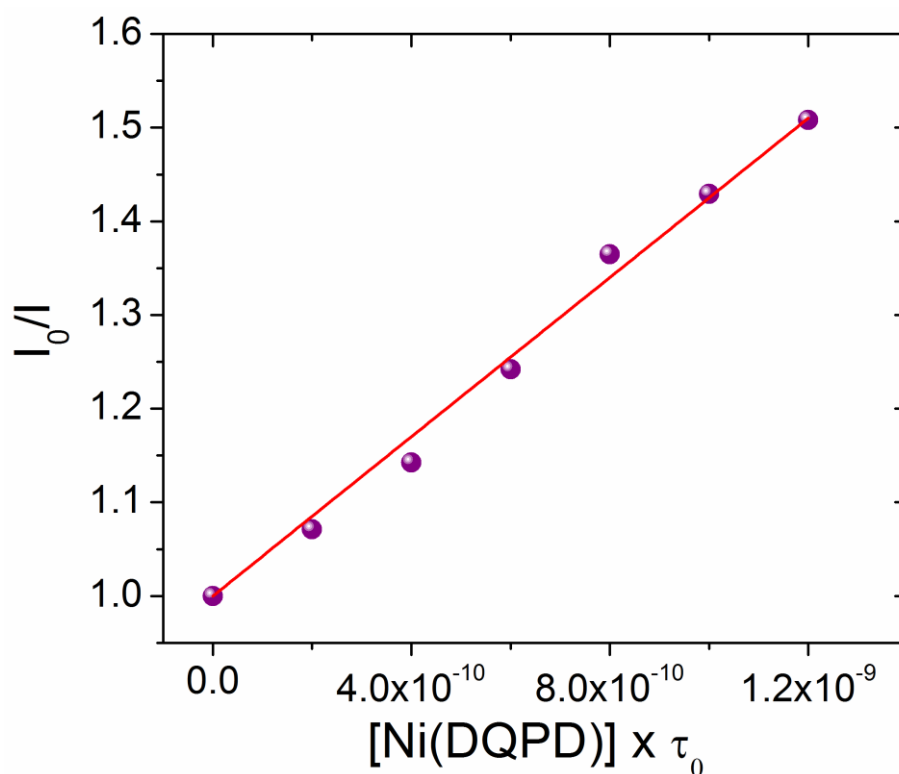

**Figure S8.** Stern-Volmer plot of the emission quenching of fluorescein solution  $5 \times 10^{-8}$  M concentration in 70:30 DMF/H<sub>2</sub>O by Ni(DQPD).

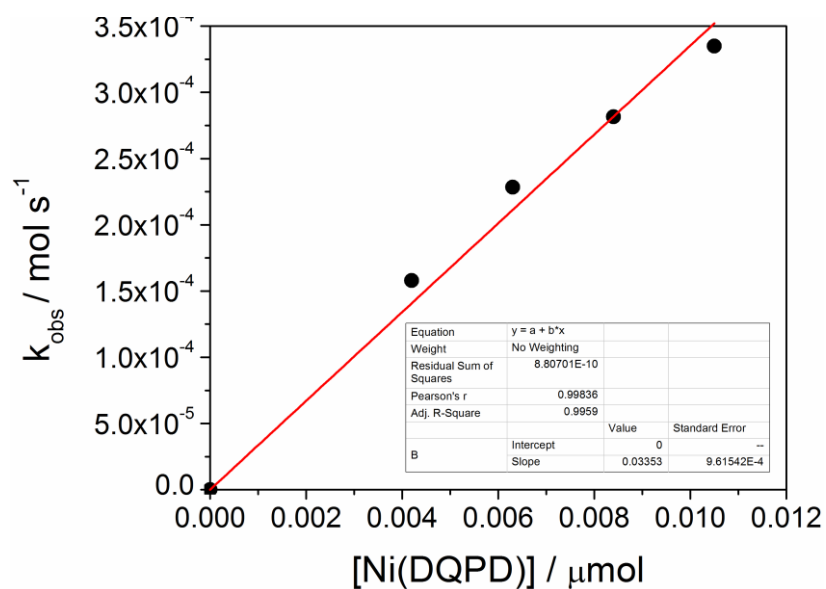

**Figure S9.** Rate of Hydrogen production with varied concentration of Ni(DQPD) complex with the presence of 2mM fluorescein in 2 mL of 70:30 DMF/H<sub>2</sub>O.

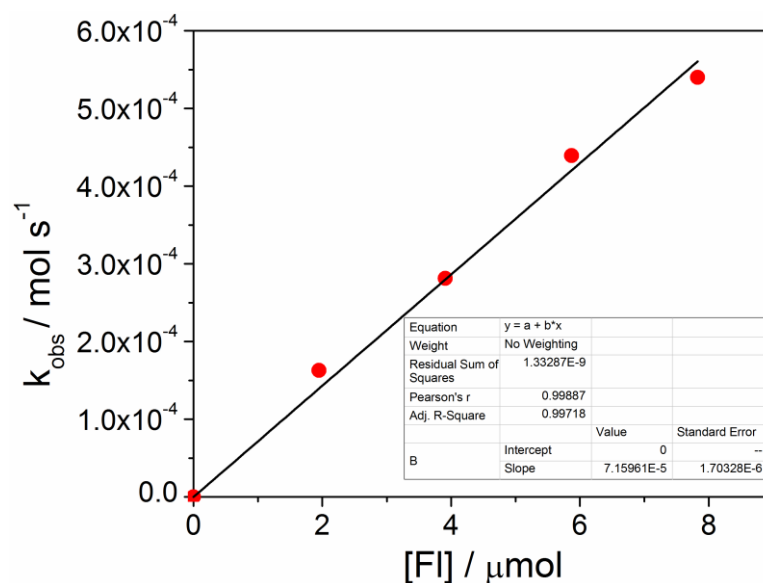

**Figure S10.** Rate of Hydrogen production by Ni(DQPD) complex with varied concentration of fluorescein in 70:30 DMF/H<sub>2</sub>O.

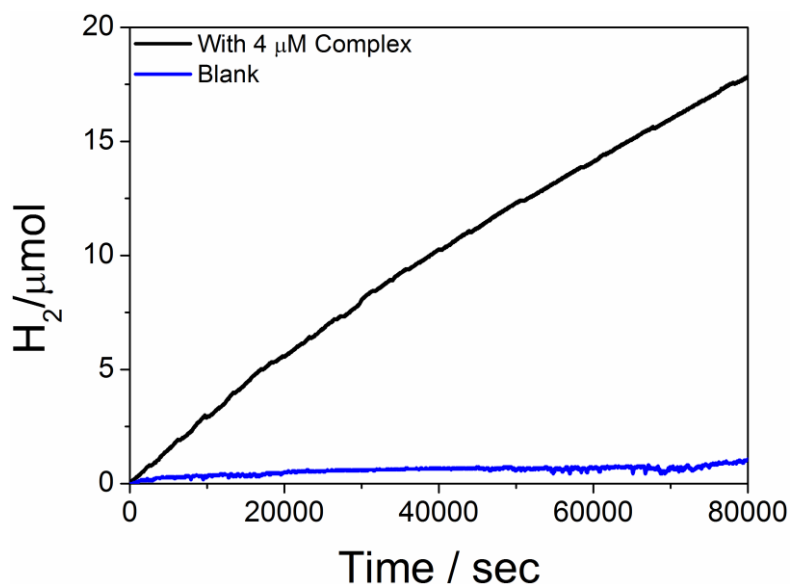

**Figure S11.** Hydrogen evolution by  $4 \times 10^{-6}$  M Ni(DQPD) complex in presence of 2 mM fluorescein in 70:30 DMF/H<sub>2</sub>O (black) and blank solution without catalyst (blue).



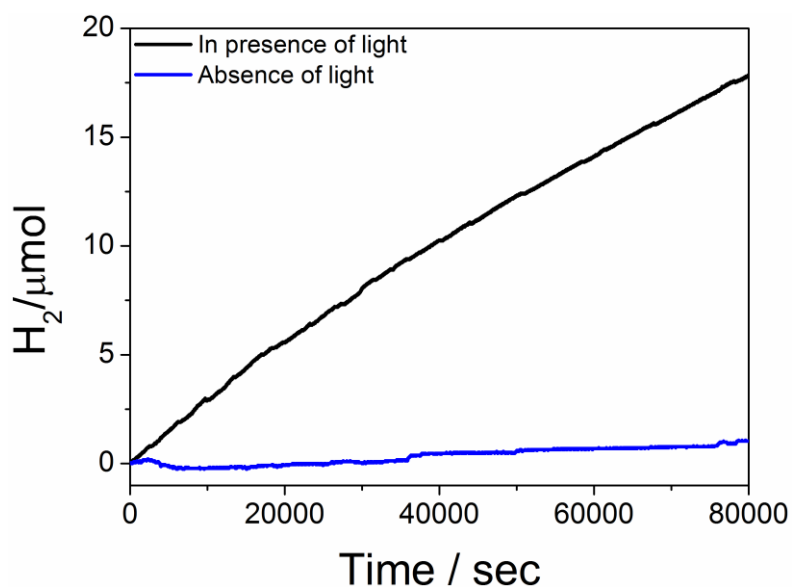

**Figure S12.** Hydrogen evolution by  $4 \times 10^{-6}$  M Ni(DQPD) complex in presence of 2 mM fluorescein in 70:30 DMF/H<sub>2</sub>O in presence of light (black) and under dark condition (blue).

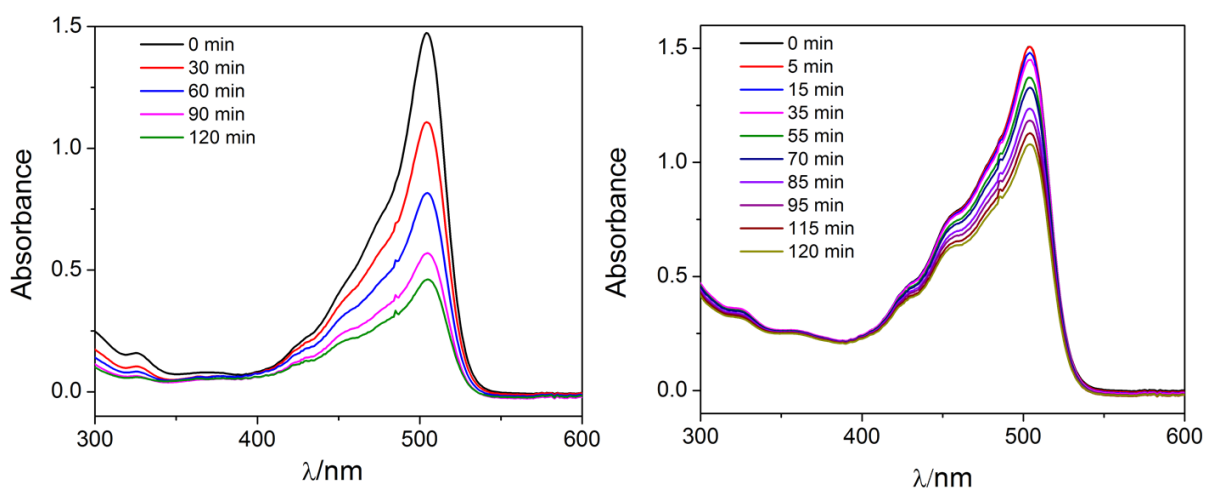

**Figure S13.** UV-vis absorption spectral change of the system containing fluorescein ( $4 \times 10^{-5}$  M) and ( $4 \times 10^{-5}$  M) TEA in 70:30 DMF/H<sub>2</sub>O (left). UV-vis absorption spectral change of the system containing fluorescein ( $4 \times 10^{-5}$  M), Ni(DQPD) ( $8 \times 10^{-5}$  M), ( $4 \times 10^{-5}$  M) TEA in 70:30 DMF/H<sub>2</sub>O (left)

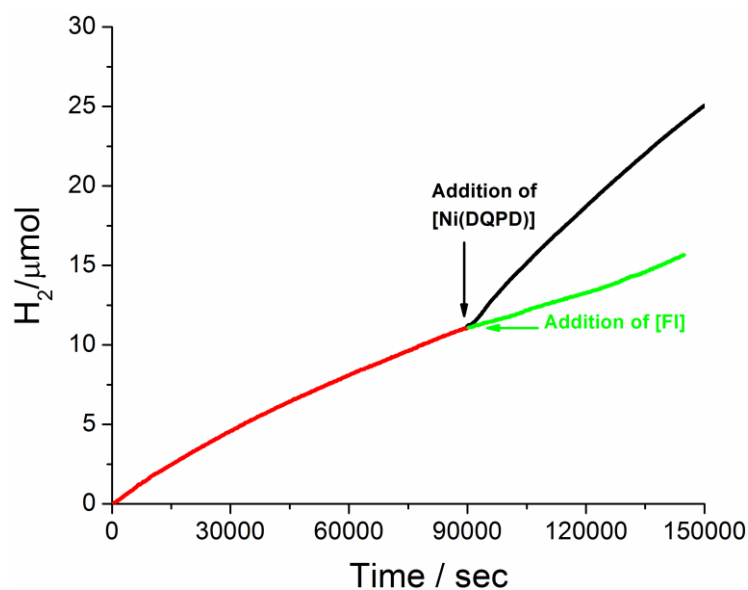

**Figure S14.** Hydrogen production with  $4 \times 10^{-6}$  M Ni(DQPD) complex in 70:30 DMF/H<sub>2</sub>O in presence of 1 mM fluorescein (Top) and [TEA] = 0.36 M and the recovery of the photocatalytic activity by the addition of extra Fl (1.0 mM) or Ni(DQPD)  $4 \times 10^{-6}$  after 25 h irradiation.

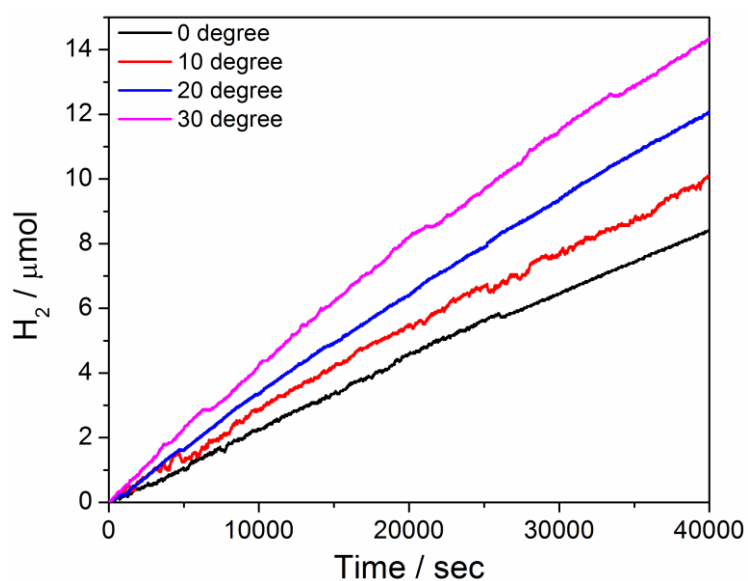

**Figure S15.** Rate of Hydrogen production at varied temperature by  $5 \times 10^{-6}$  M [Ni(DQPD)] complex in presence of 2 mM fluorescein in 70:30 DMF/H<sub>2</sub>O.

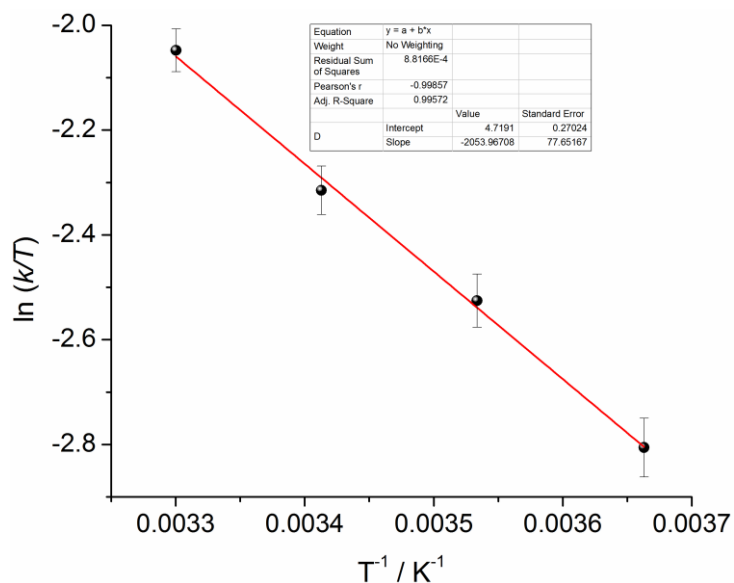

**Figure S16.** Eyring-Polanyi plot of Hydrogen evolution at varied temperature by  $5 \times 10^{-6}$  M [Ni(DQPD)] complex in presence of 2 mM fluorescein in 70:30 DMF/H<sub>2</sub>O.

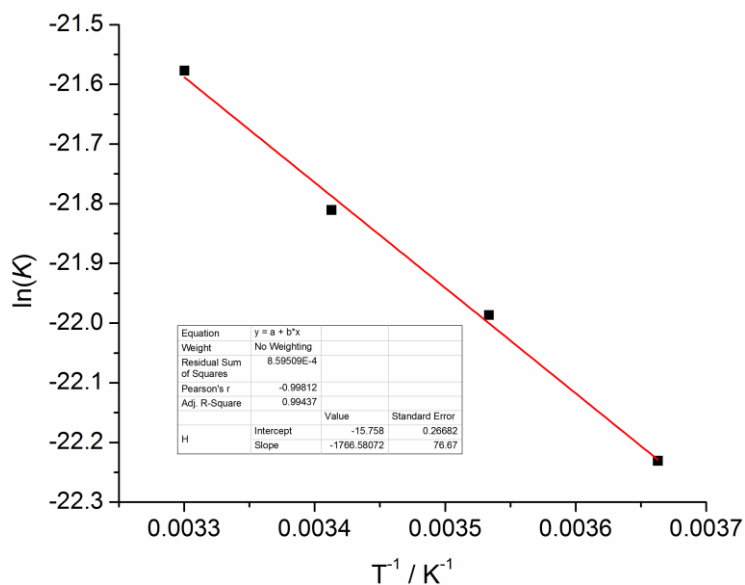

**Figure S17.** Arrhenius plot of Hydrogen evolution at varied temperature by  $5 \times 10^{-6}$  M [Ni(DQPD)] complex in presence of 2 mM fluorescein in 70:30 DMF/H<sub>2</sub>O.

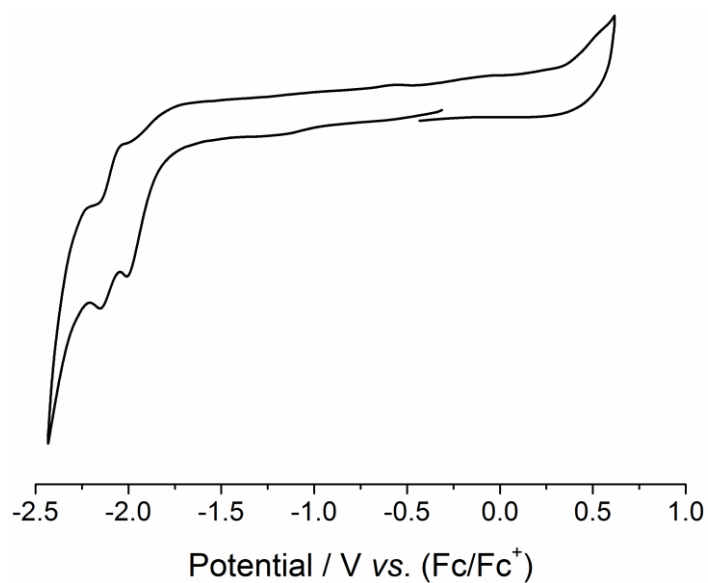

**Figure S18.** CV of 1.0 mM **DQPDH<sub>2</sub>** in DMF, 0.1 M TBAP, and an electrochemical potential scan rate of 100 mV s<sup>-1</sup>.

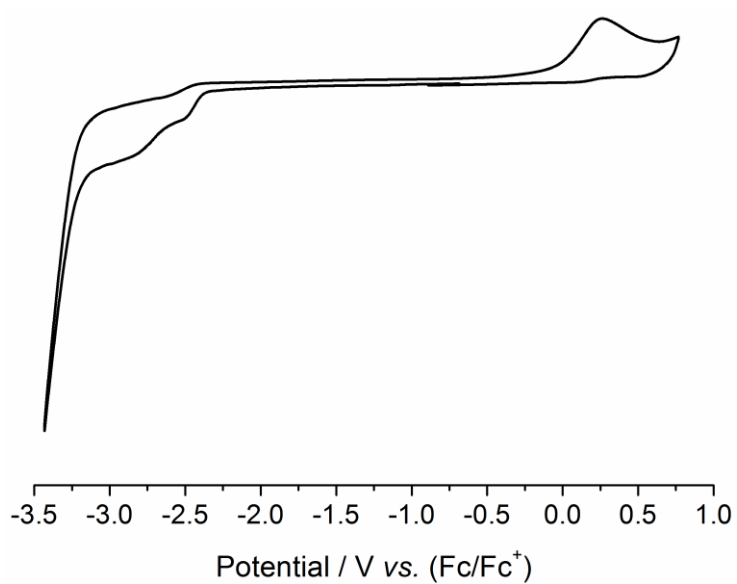

**Figure S19.** CV of 1.0 mM **DQPDH<sub>2</sub>** in DMF, 0.1 M TBAP, and an electrochemical potential scan rate of 100 mV s<sup>-1</sup> under N<sub>2</sub> after addition of 2 equivalents of NaH.

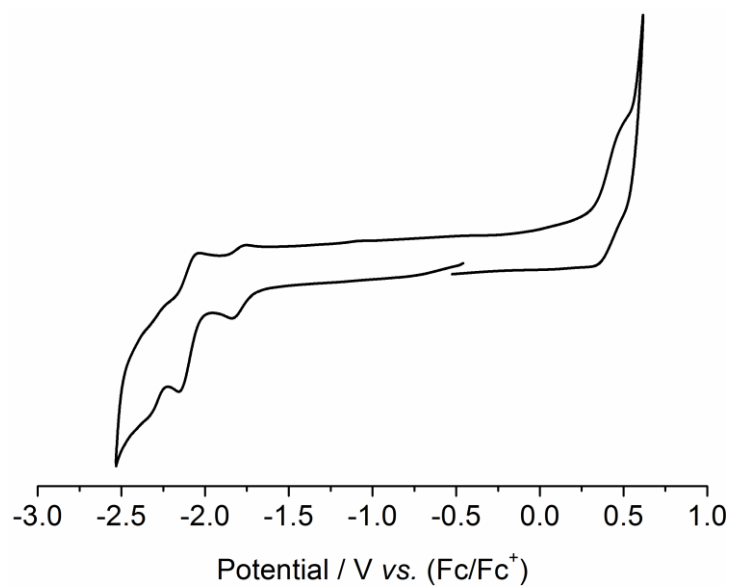

**Figure S20.** CV of Ni(DQPD) complex prepared *in situ* from, 1.0 mM DQPDH<sub>2</sub> in DMF, 0.1 M TBAP, and an electrochemical potential scan rate of 100 mV s<sup>-1</sup> under N<sub>2</sub> after addition of 2 equivalents of NaH, following one equiv. of NiCl<sub>2</sub>·6H<sub>2</sub>O.

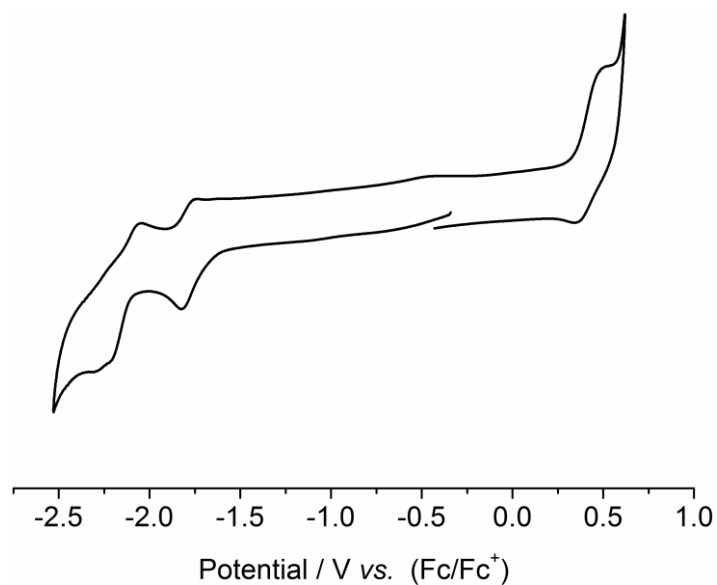

**Figure S21.** CV of 1.0 mM isolated Ni(DQPD) complex in DMF, 0.1 M TBAP, and an electrochemical potential scan rate of 100 mV s<sup>-1</sup> under N<sub>2</sub>.

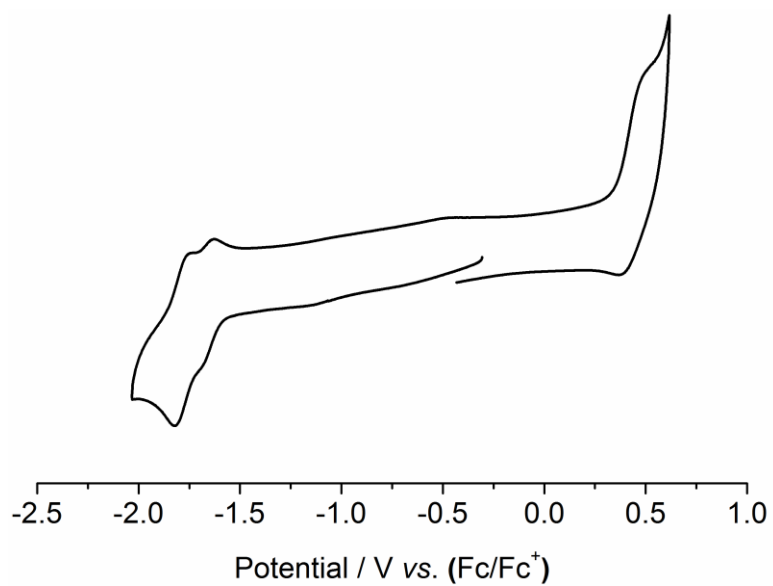

**Figure S22.** CV of 1.0 mM isolated Ni(DQPD) complex in presence one equiv. of AcOH, in DMF, 0.1 M TBAP, and an electrochemical potential scan rate of  $100 \text{ mV s}^{-1}$  under  $\text{N}_2$ .

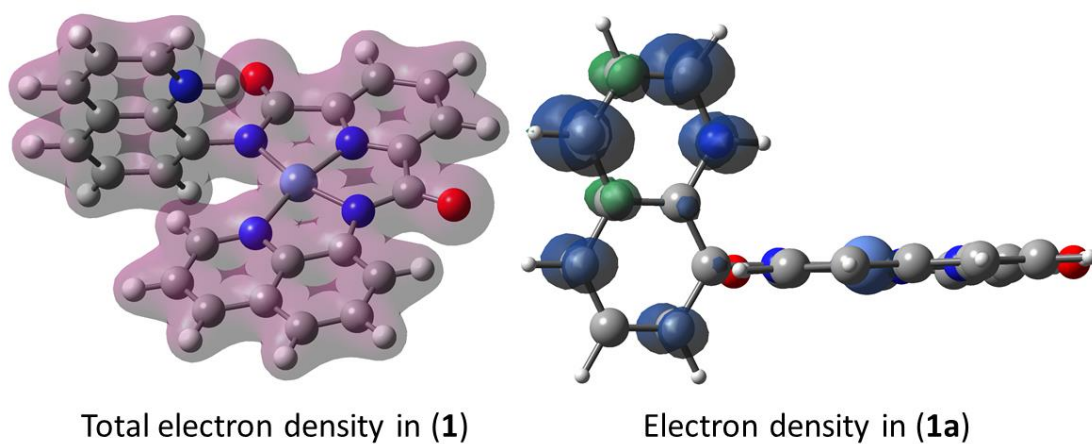

**Figure S23.** The electron density in (1) and (1a).

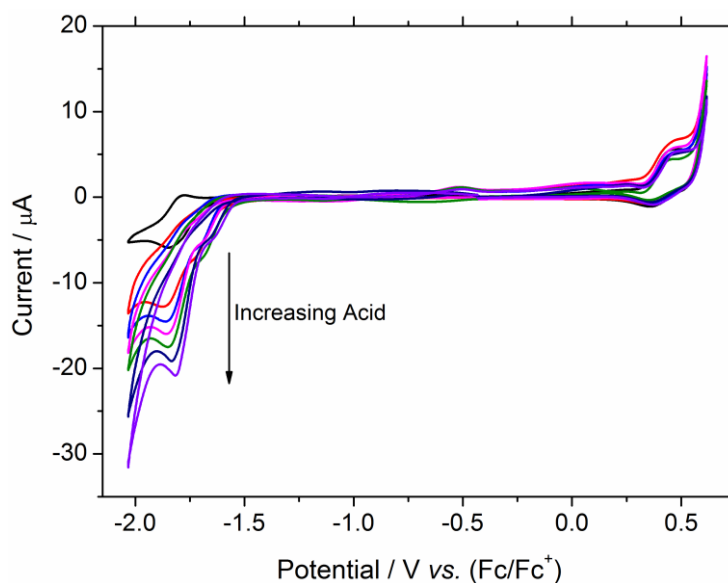

**Figure S24.** CV of Ni(DQPD) in the presence of varying concentrations of CH<sub>3</sub>COOH. The experimental conditions are 0.5 mM Ni(DQPD) in DMF/H<sub>2</sub>O (95:5, v/v), 0.1 M TBAP, and an electrochemical potential scan rate of 100 mV s<sup>-1</sup>. The CH<sub>3</sub>COOH equivalents are 2.5, 5.0, 7.5, 10.0, 12.5 and 15.0 respectively from red to violet color.

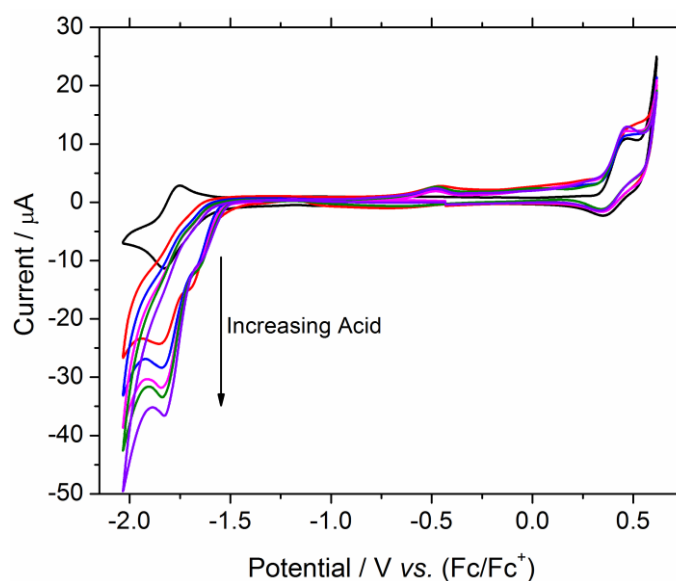

**Figure S25.** CV of Ni(DQPD) in the presence of varying concentrations of CH<sub>3</sub>COOH. The experimental conditions are 1.0 mM Ni(DQPD) in DMF/H<sub>2</sub>O (95:5, v/v), 0.1 M TBAP, and an electrochemical potential scan rate of 100 mV s<sup>-1</sup>. The CH<sub>3</sub>COOH equivalents are 2.5, 5.0, 7.5, 10.0, and 15.0 respectively from red to violet color.

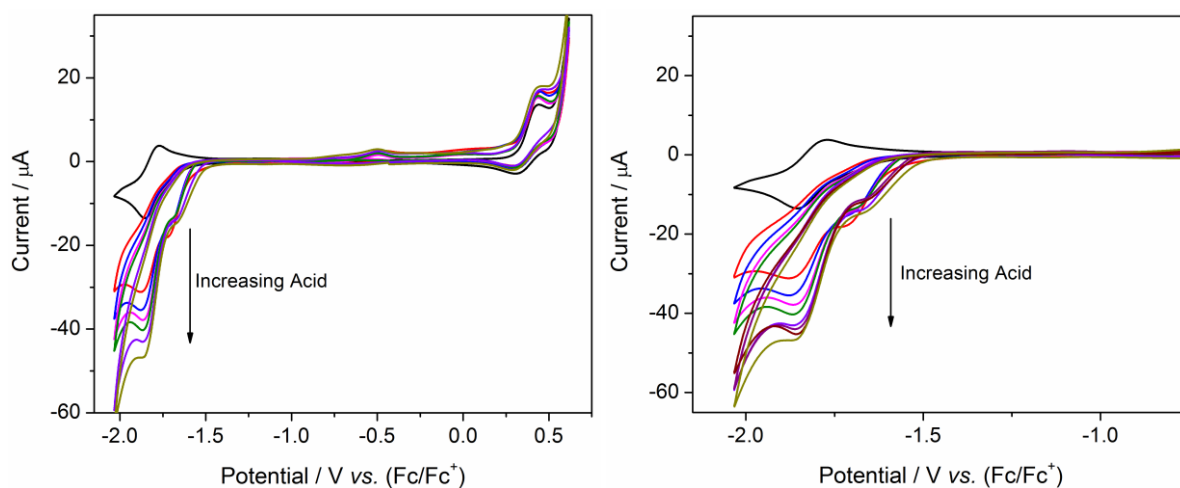

**Figure S26.** CV of Ni(DQPD) in the presence of varying concentrations of CH<sub>3</sub>COOH. The experimental conditions are 1.5 mM Ni(DQPD) in DMF/H<sub>2</sub>O (95:5, v/v), 0.1 M TBAP, and an electrochemical potential scan rate of 100 mV s<sup>-1</sup>. The CH<sub>3</sub>COOH equivalents are 2.5, 5.0, 7.5, 10.0, 15.0 and 22.5 respectively from red to brown color. (Right side 2.5, 5.0, 7.5, 10.0, 15.0, 17.5, 20 and 22.5).

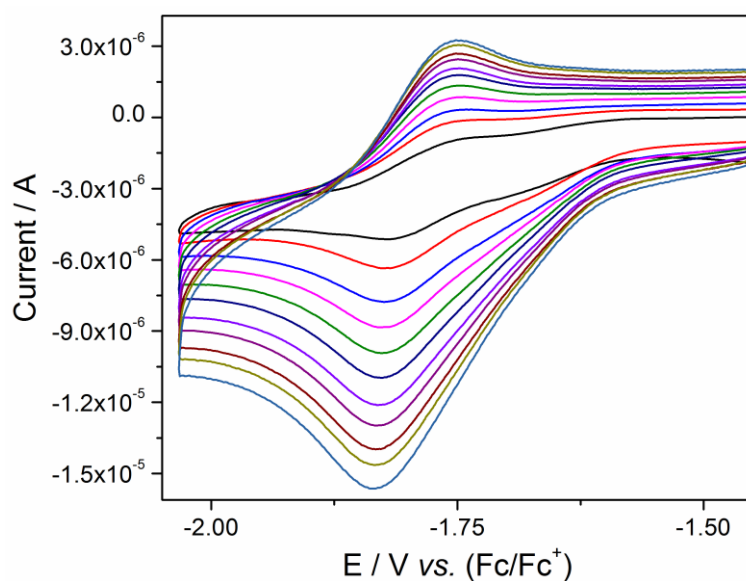

**Figure S27.** Cyclic voltammograms of 1.0 mM Ni(DQPD) complex and in presence of 0.1 M TBAP as supporting electrolyte in DMF/H<sub>2</sub>O (95:5, v/v) solution at varying scan rates.



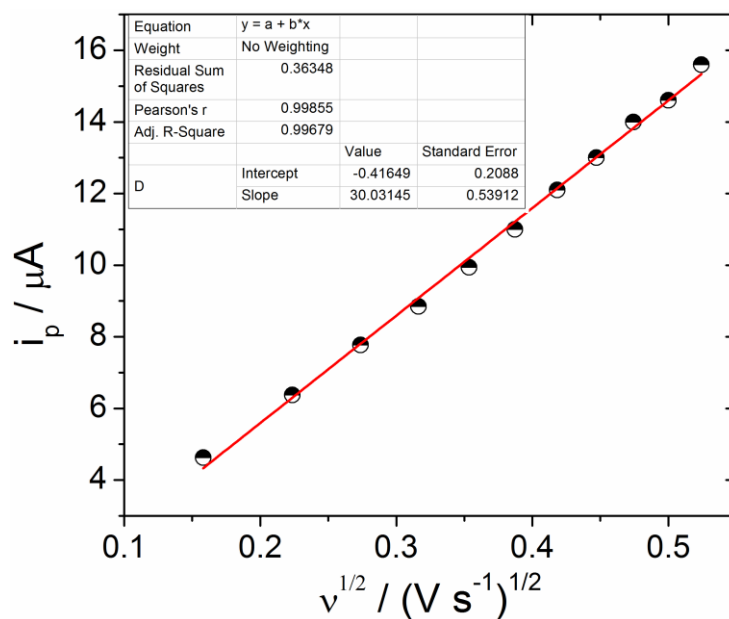

**Figure S28.** Peak current ( $i_p$ ) vs. square root of scan rate ( $v^{1/2}$ ) with linear fitted slope  $3.0 \times 10^{-5} \text{ A V}^{-1/2} \text{ s}^{1/2}$ .

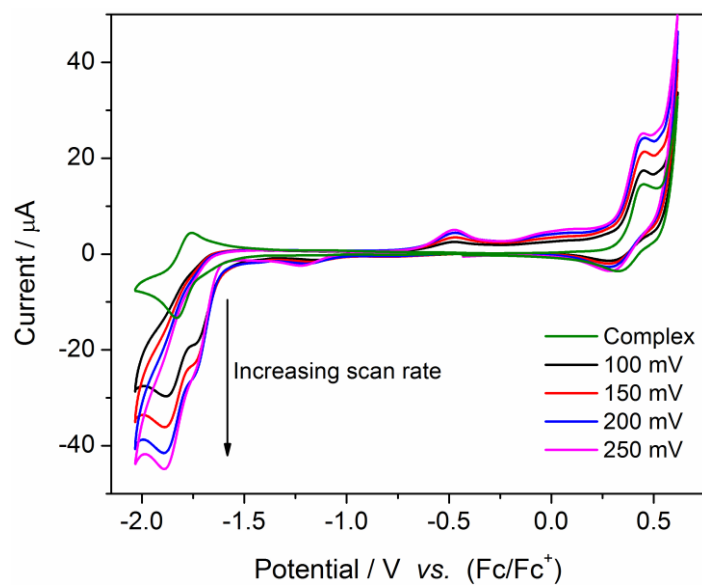

**Figure S29.** CV of 1.5 mM Ni(DQPD) in DMF/H<sub>2</sub>O (95:5, v/v) 0.1 M TBAP and scan rate 100 mV/s (green). Catalytic current in presence 2.5 equivalent of CH<sub>3</sub>COOH at a varying scan rate, of 100, 150, 200, and 250 mV s<sup>-1</sup> (black to pink color respectively).

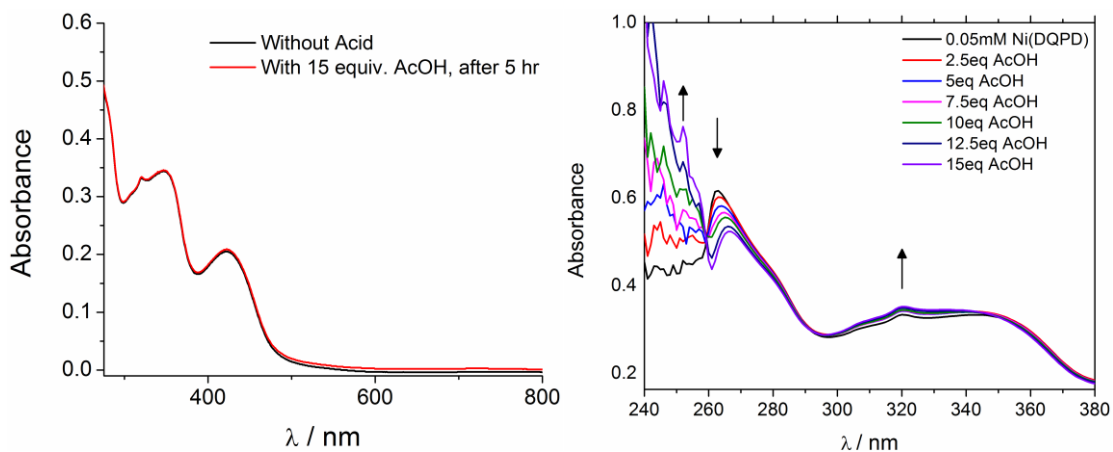

**Figure S30.** The UV-Visible spectrum of the 0.05 mM Ni(DQPD) complex in DMF/H<sub>2</sub>O (95:5, v/v) with addition of 15 equivalent of CH<sub>3</sub>COOH (left). Acid titration of 0.05 mM Ni(DQPD) complex in DMF/H<sub>2</sub>O (95:5, v/v) (right).

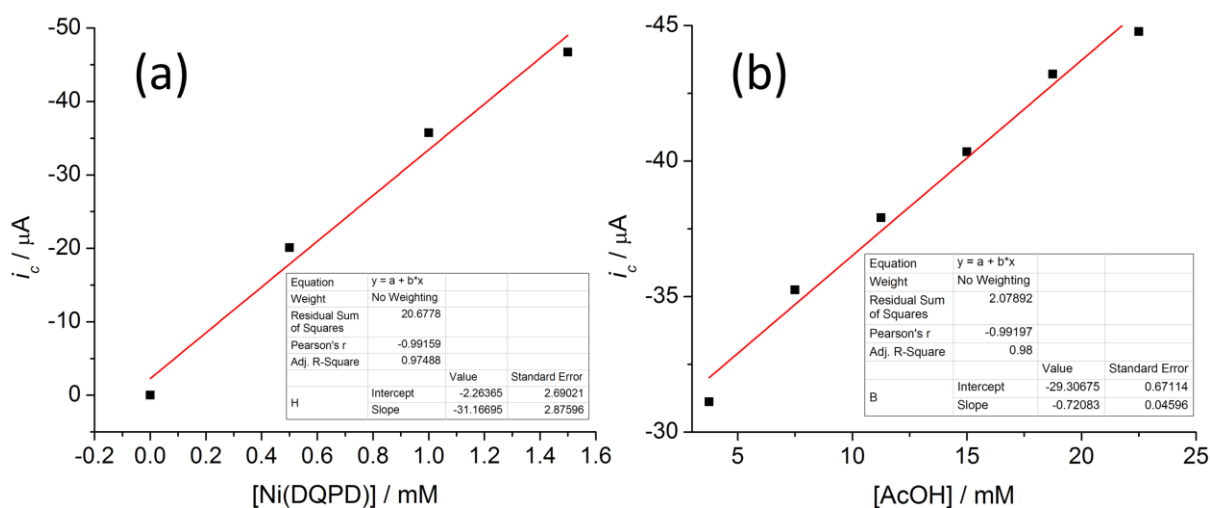

**Figure S31.** Dependence of catalytic current,  $i_c$ , (a) on metal concentration in presence of 15 equivalent of acetic acid. (b) On acetic acid concentration for a catalyst concentration of 1.5 mM. The supporting electrolyte is 0.1 M TBAP, and the potential scan rate is 100 mV s<sup>-1</sup>.

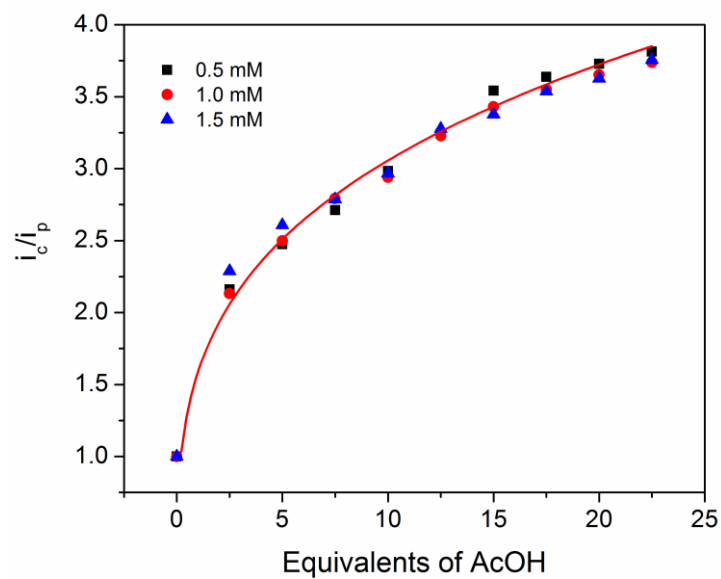

**Figure S32.** Dependence of  $i_c/i_p$ , on acetic acid concentration for three different concentrations of catalyst. Experiments were undertaken at three different catalyst concentrations: 0.5, 1.0 and 1.5 mM catalyst. The supporting electrolyte is 0.1 M TBAP, and the potential scan rate is 100  $\text{mV s}^{-1}$ .

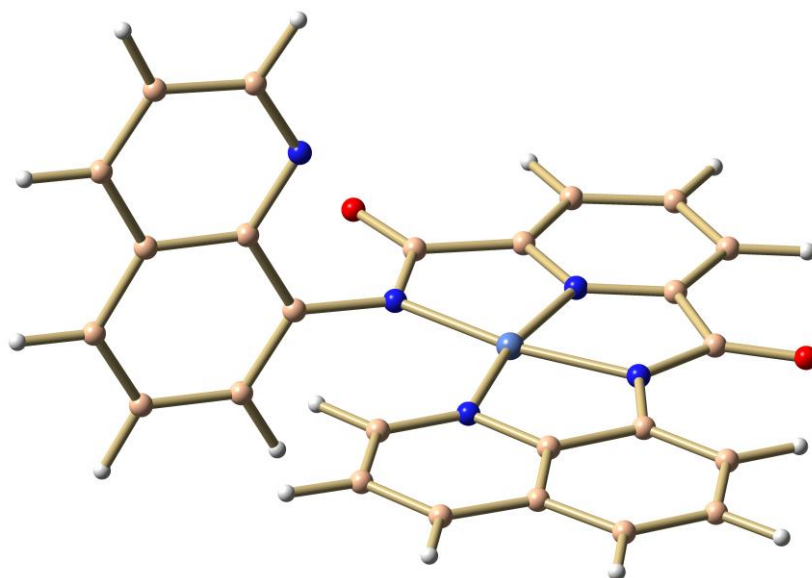

**Figure S33.** Optimized structure of Ni(DQPD).

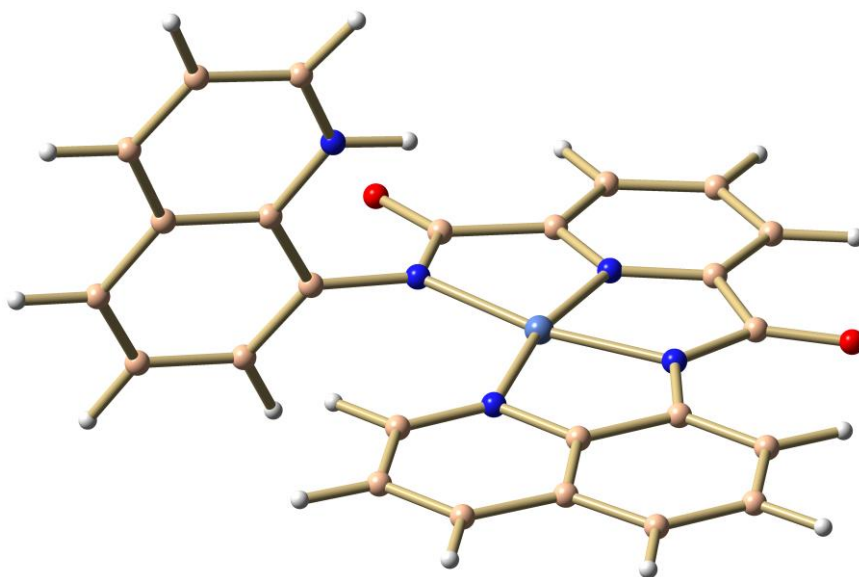

**Figure S34.** Optimized structure of **1** generated after protonation of Ni(DQPD).

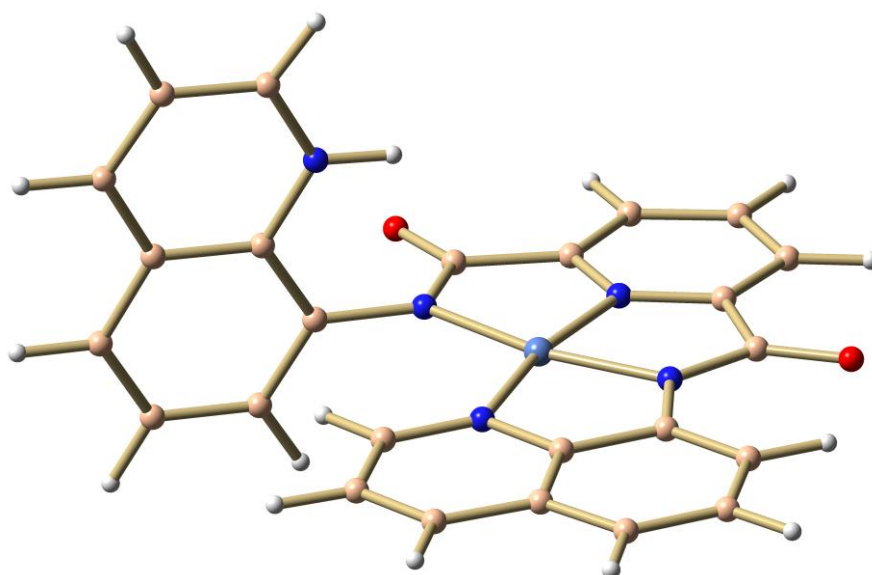

**Figure S35.** Optimized structure of **1a** generated after one electron reduction of **1**.

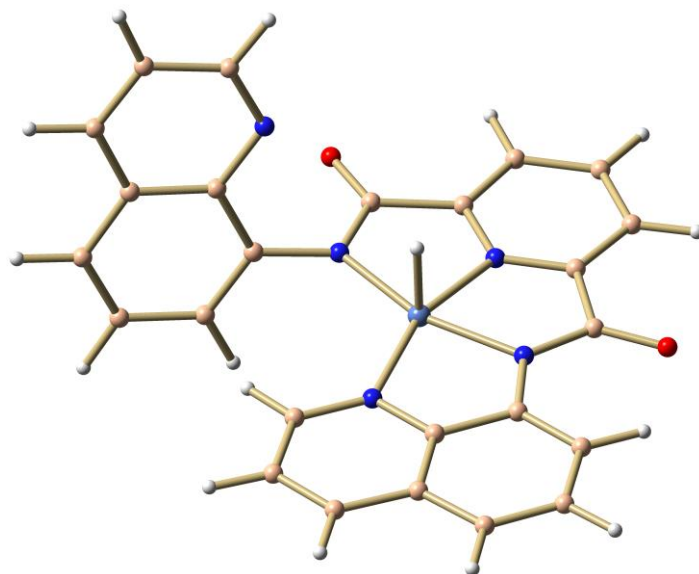

**Figure S36.** Optimized structure of **2a** generated after one electron reduction of  $\text{Ni}^{\text{II}}(\text{DQPD})$  to  $\text{Ni}^{\text{I}}(\text{DQPD})$  followed by protonation. The complex **2a** is energetically 40 kCal/mol less stable than **1a**.

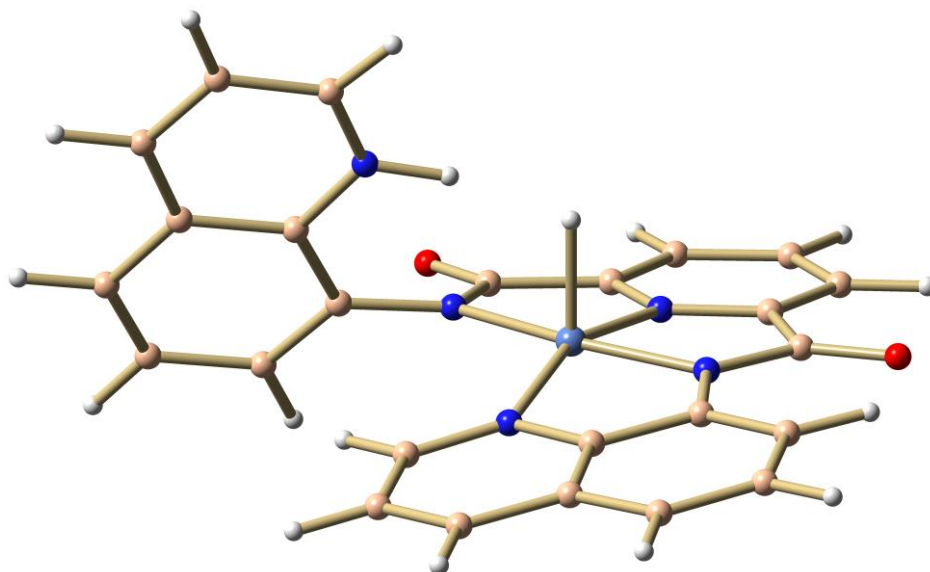

**Figure S37.** Optimized structure of **1b** generated after protonation of **1a**.

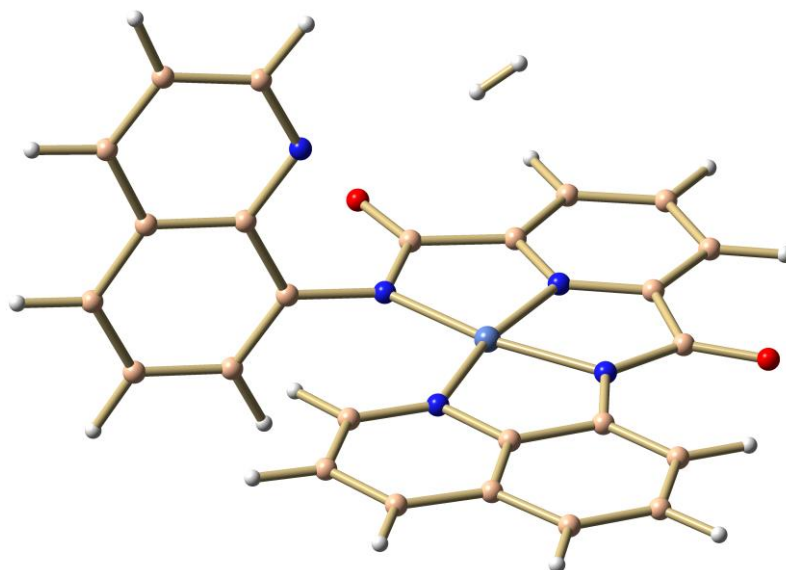

**Figure S38.** Optimized structure of **1c** generated after one electron reduction of **1b**. Upon one electron reduction to **1b**, wherein the hydrogen molecule formed and dissociated from the Ni atom generates the reduced complex **1c**.

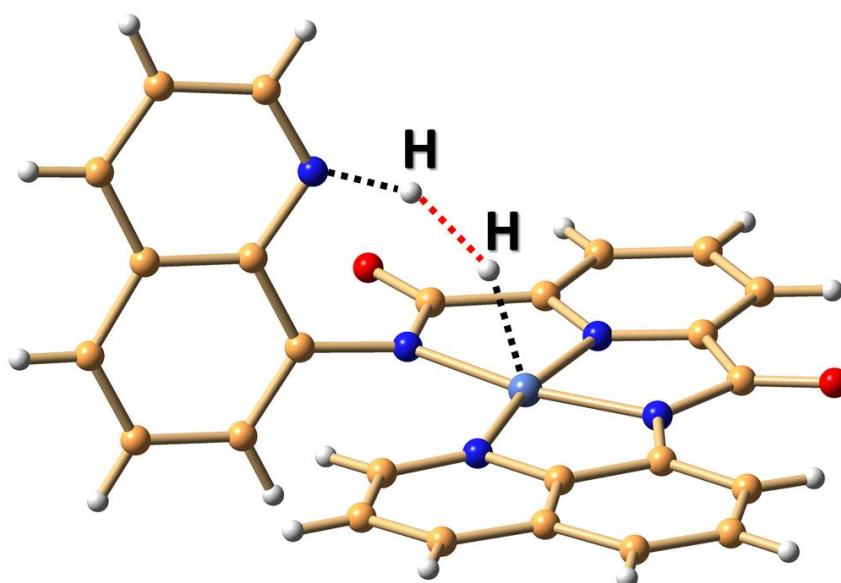

**Figure S39.** The transition state **TS1** identified by carrying out a synchronous transit-guided quasi-Newton (STQN) calculation using (**1b**) as a starting structure and the product as (**Intermediate**).

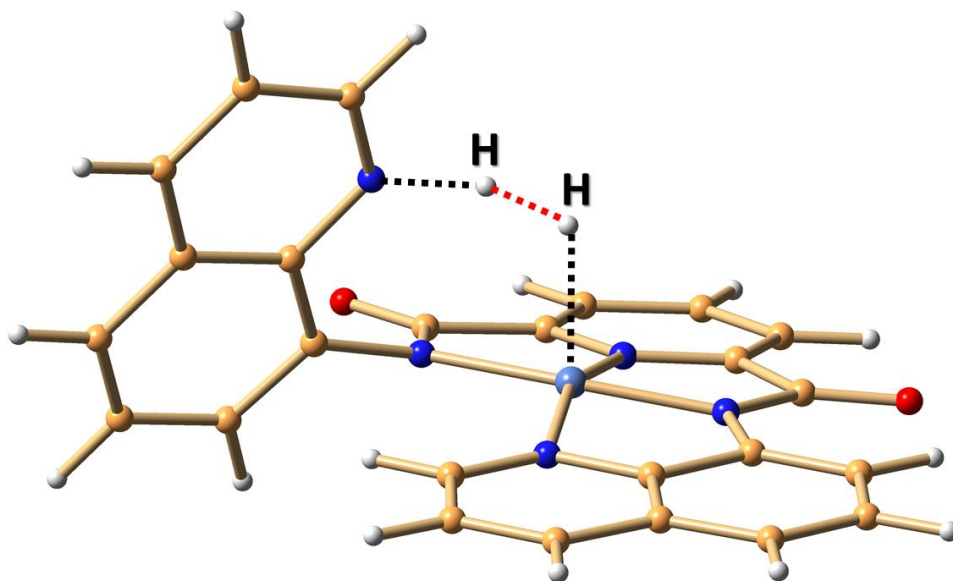

**Figure S40.** Structure of the intermediate.

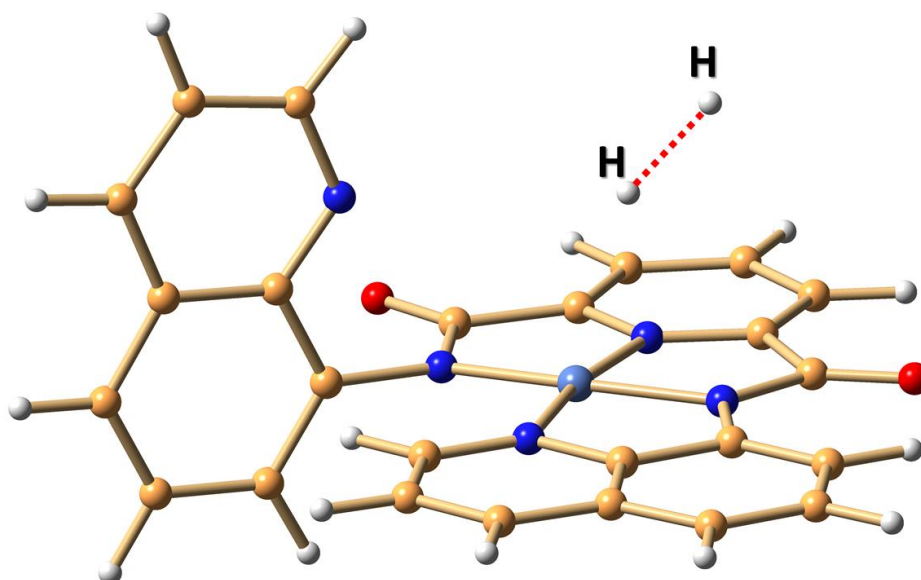

**Figure S41.** The transition state **TS2** identified by carrying out a synchronous transit-guided quasi-Newton (STQN) calculation using (**intermediate**) as a starting structure and the product as (**1c**).

**Table S1.** Crystal Data and Refinement Parameters of **Ni(DQPD)·H<sub>2</sub>O**.

| <b>Ni(DQPD)·H<sub>2</sub>O</b>                 |                                                                                |
|------------------------------------------------|--------------------------------------------------------------------------------|
| CCDC Number                                    | CCDC 1401801                                                                   |
| Empirical formula                              | C <sub>25</sub> H <sub>15</sub> N <sub>5</sub> NiO <sub>2</sub>                |
| Formula weight                                 | 494.13                                                                         |
| Temperature (K)                                | 296(2)                                                                         |
| Wavelength, Å                                  | 0.71073                                                                        |
| Crystal system                                 | Monoclinic                                                                     |
| Space group                                    | <i>P2<sub>1</sub>/c</i>                                                        |
| <i>a</i> , Å                                   | 11.555(1)                                                                      |
| <i>b</i> , Å                                   | 19.806(1)                                                                      |
| <i>c</i> , Å                                   | 9.154(1)                                                                       |
| $\alpha$ , deg                                 | 90                                                                             |
| $\beta$ , deg                                  | 94.097(3)                                                                      |
| $\gamma$ , deg                                 | 90                                                                             |
| <i>V</i> , Å <sup>3</sup>                      | 2089.46                                                                        |
| <i>Z</i>                                       | 4                                                                              |
| <i>D</i> <sub>calc</sub> (g cm <sup>-3</sup> ) | 1.414                                                                          |
| $\mu$ , (mm <sup>-1</sup> )                    | 0.950                                                                          |
| <sup>a</sup> GOF on F <sup>2</sup>             | 0.993                                                                          |
| R [ <i>I</i> >2 $\sigma$ ( <i>I</i> )]         | <sup>b</sup> R <sub>1</sub> = 0.0578,<br><sup>c</sup> wR <sub>2</sub> = 0.1267 |
| R indices (all data)                           | <sup>b</sup> R <sub>1</sub> = 0.1413,<br><sup>c</sup> wR <sub>2</sub> = 0.1753 |

<sup>a</sup>GOF =  $[\sum[w(F_o^2 - F_c^2)^2]/M - N]^{1/2}$  (*M* = number of reflections, *N* = number of parameters refined). <sup>b</sup>R<sub>1</sub> =  $\sum ||F_o| - |F_c||/\sum|F_o|$ . <sup>c</sup>wR<sub>2</sub> =  $[\sum[w(F_o^2 - F_c^2)^2]/\sum[w(F_o^2)^2]]$ .

**Table S2.** XYZ coordinates for **Ni(DQPD)**

| Center Number | Atomic Number | Atomic Type | Coordinates (Angstroms) |           |          |
|---------------|---------------|-------------|-------------------------|-----------|----------|
|               |               |             | X                       | Y         | Z        |
| 1             | 28            | 0           | 1.102000                | 0.624000  | 5.869000 |
| 2             | 7             | 0           | 1.951000                | -0.671000 | 4.909000 |



|    |   |   |           |           |          |
|----|---|---|-----------|-----------|----------|
| 3  | 7 | 0 | 2.551000  | 1.706000  | 5.241000 |
| 4  | 7 | 0 | -0.069000 | -0.755000 | 6.273000 |
| 5  | 8 | 0 | 4.450000  | 1.553000  | 3.904000 |
| 6  | 8 | 0 | -0.359000 | -3.068000 | 6.047000 |
| 7  | 6 | 0 | 3.435000  | 1.073000  | 4.424000 |
| 8  | 6 | 0 | 1.454000  | -1.925000 | 4.945000 |
| 9  | 6 | 0 | 3.067000  | -0.360000 | 4.233000 |
| 10 | 6 | 0 | 3.718000  | -1.333000 | 3.516000 |
| 11 | 1 | 0 | 4.476000  | -1.125000 | 3.020000 |
| 12 | 6 | 0 | 0.231000  | -2.012000 | 5.807000 |
| 13 | 6 | 0 | 2.088000  | -2.935000 | 4.257000 |
| 14 | 1 | 0 | 1.754000  | -3.803000 | 4.272000 |
| 15 | 6 | 0 | 3.229000  | -2.632000 | 3.544000 |
| 16 | 1 | 0 | 3.673000  | -3.304000 | 3.077000 |
| 17 | 6 | 0 | -1.121000 | -0.432000 | 7.145000 |
| 18 | 6 | 0 | -3.083000 | -0.669000 | 8.506000 |
| 19 | 1 | 0 | -3.767000 | -1.210000 | 8.831000 |
| 20 | 6 | 0 | -1.070000 | 0.945000  | 7.514000 |
| 21 | 6 | 0 | -3.035000 | 0.626000  | 8.894000 |
| 22 | 1 | 0 | -3.666000 | 0.955000  | 9.492000 |
| 23 | 6 | 0 | -2.026000 | 1.481000  | 8.392000 |
| 24 | 6 | 0 | -0.008000 | 2.983000  | 7.263000 |
| 25 | 1 | 0 | 0.664000  | 3.504000  | 6.889000 |
| 26 | 6 | 0 | -0.923000 | 3.593000  | 8.117000 |

|    |   |   |           |           |          |
|----|---|---|-----------|-----------|----------|
| 27 | 1 | 0 | -0.863000 | 4.504000  | 8.291000 |
| 28 | 6 | 0 | -1.911000 | 2.850000  | 8.699000 |
| 29 | 1 | 0 | -2.505000 | 3.246000  | 9.294000 |
| 30 | 6 | 0 | -2.136000 | -1.228000 | 7.630000 |
| 31 | 1 | 0 | -2.194000 | -2.121000 | 7.382000 |
| 32 | 6 | 0 | 2.887000  | 3.047000  | 5.587000 |
| 33 | 6 | 0 | 3.801000  | 3.317000  | 6.641000 |
| 34 | 6 | 0 | 4.102000  | 4.672000  | 6.962000 |
| 35 | 6 | 0 | 3.444000  | 5.708000  | 6.270000 |
| 36 | 1 | 0 | 3.612000  | 6.593000  | 6.501000 |
| 37 | 6 | 0 | 2.573000  | 5.433000  | 5.277000 |
| 38 | 1 | 0 | 2.156000  | 6.126000  | 4.821000 |
| 39 | 6 | 0 | 2.290000  | 4.086000  | 4.926000 |
| 40 | 1 | 0 | 1.690000  | 3.910000  | 4.237000 |
| 41 | 7 | 0 | 4.341000  | 2.259000  | 7.324000 |
| 42 | 6 | 0 | 5.033000  | 4.918000  | 7.975000 |
| 43 | 1 | 0 | 5.266000  | 5.789000  | 8.202000 |
| 44 | 7 | 0 | -0.053000 | 1.692000  | 6.960000 |
| 45 | 6 | 0 | 5.195000  | 2.553000  | 8.289000 |
| 46 | 1 | 0 | 5.559000  | 1.850000  | 8.777000 |
| 47 | 6 | 0 | 5.589000  | 3.860000  | 8.627000 |
| 48 | 1 | 0 | 6.226000  | 4.003000  | 9.290000 |

---

**Table S3.** XYZ coordinates for Ni(DQPDH) (1)

| Center<br>Number | Atomic<br>Number | Atomic<br>Type | Coordinates (Angstroms) |           |          |
|------------------|------------------|----------------|-------------------------|-----------|----------|
|                  |                  |                | X                       | Y         | Z        |
| 1                | 28               | 0              | 1.102000                | 0.624000  | 5.869000 |
| 2                | 7                | 0              | 1.951000                | -0.671000 | 4.909000 |
| 3                | 7                | 0              | 2.551000                | 1.706000  | 5.241000 |
| 4                | 7                | 0              | -0.069000               | -0.755000 | 6.273000 |
| 5                | 8                | 0              | 4.450000                | 1.553000  | 3.904000 |
| 6                | 8                | 0              | -0.359000               | -3.068000 | 6.047000 |
| 7                | 6                | 0              | 3.435000                | 1.073000  | 4.424000 |
| 8                | 6                | 0              | 1.454000                | -1.925000 | 4.945000 |
| 9                | 6                | 0              | 3.067000                | -0.360000 | 4.233000 |
| 10               | 6                | 0              | 3.718000                | -1.333000 | 3.516000 |
| 11               | 1                | 0              | 4.476000                | -1.125000 | 3.020000 |
| 12               | 6                | 0              | 0.231000                | -2.012000 | 5.807000 |
| 13               | 6                | 0              | 2.088000                | -2.935000 | 4.257000 |
| 14               | 1                | 0              | 1.754000                | -3.803000 | 4.272000 |
| 15               | 6                | 0              | 3.229000                | -2.632000 | 3.544000 |
| 16               | 1                | 0              | 3.673000                | -3.304000 | 3.077000 |
| 17               | 6                | 0              | -1.121000               | -0.432000 | 7.145000 |
| 18               | 6                | 0              | -3.083000               | -0.669000 | 8.506000 |
| 19               | 1                | 0              | -3.767000               | -1.210000 | 8.831000 |
| 20               | 6                | 0              | -1.070000               | 0.945000  | 7.514000 |

|    |   |   |           |           |          |
|----|---|---|-----------|-----------|----------|
| 21 | 6 | 0 | -3.035000 | 0.626000  | 8.894000 |
| 22 | 1 | 0 | -3.666000 | 0.955000  | 9.492000 |
| 23 | 6 | 0 | -2.026000 | 1.481000  | 8.392000 |
| 24 | 6 | 0 | -0.008000 | 2.983000  | 7.263000 |
| 25 | 1 | 0 | 0.664000  | 3.504000  | 6.889000 |
| 26 | 6 | 0 | -0.923000 | 3.593000  | 8.117000 |
| 27 | 1 | 0 | -0.863000 | 4.504000  | 8.291000 |
| 28 | 6 | 0 | -1.911000 | 2.850000  | 8.699000 |
| 29 | 1 | 0 | -2.505000 | 3.246000  | 9.294000 |
| 30 | 6 | 0 | -2.136000 | -1.228000 | 7.630000 |
| 31 | 1 | 0 | -2.194000 | -2.121000 | 7.382000 |
| 32 | 6 | 0 | 2.887000  | 3.047000  | 5.587000 |
| 33 | 6 | 0 | 3.801000  | 3.317000  | 6.641000 |
| 34 | 6 | 0 | 4.102000  | 4.672000  | 6.962000 |
| 35 | 6 | 0 | 3.444000  | 5.708000  | 6.270000 |
| 36 | 1 | 0 | 3.612000  | 6.593000  | 6.501000 |
| 37 | 6 | 0 | 2.573000  | 5.433000  | 5.277000 |
| 38 | 1 | 0 | 2.156000  | 6.126000  | 4.821000 |
| 39 | 6 | 0 | 2.290000  | 4.086000  | 4.926000 |
| 40 | 1 | 0 | 1.690000  | 3.910000  | 4.237000 |
| 41 | 7 | 0 | 4.341000  | 2.259000  | 7.324000 |
| 42 | 6 | 0 | 5.033000  | 4.918000  | 7.975000 |
| 43 | 1 | 0 | 5.266000  | 5.789000  | 8.202000 |
| 44 | 7 | 0 | -0.053000 | 1.692000  | 6.960000 |

|    |   |   |          |          |          |
|----|---|---|----------|----------|----------|
| 45 | 6 | 0 | 5.195000 | 2.553000 | 8.289000 |
| 46 | 1 | 0 | 5.559000 | 1.850000 | 8.777000 |
| 47 | 6 | 0 | 5.589000 | 3.860000 | 8.627000 |
| 48 | 1 | 0 | 6.226000 | 4.003000 | 9.290000 |
| 49 | 1 | 0 | 4.101402 | 1.313434 | 7.103781 |

-----

**Table S4.** XYZ coordinates for **(1a)**

-----

| Center | Atomic | Atomic | Coordinates (Angstroms) |           |          |
|--------|--------|--------|-------------------------|-----------|----------|
| Number | Number | Type   | X                       | Y         | Z        |
| 1      | 28     | 0      | 1.102000                | 0.624000  | 5.869000 |
| 2      | 7      | 0      | 1.951000                | -0.671000 | 4.909000 |
| 3      | 7      | 0      | 2.551000                | 1.706000  | 5.241000 |
| 4      | 7      | 0      | -0.069000               | -0.755000 | 6.273000 |
| 5      | 8      | 0      | 4.450000                | 1.553000  | 3.904000 |
| 6      | 8      | 0      | -0.359000               | -3.068000 | 6.047000 |
| 7      | 6      | 0      | 3.435000                | 1.073000  | 4.424000 |
| 8      | 6      | 0      | 1.454000                | -1.925000 | 4.945000 |
| 9      | 6      | 0      | 3.067000                | -0.360000 | 4.233000 |
| 10     | 6      | 0      | 3.718000                | -1.333000 | 3.516000 |
| 11     | 1      | 0      | 4.476000                | -1.125000 | 3.020000 |
| 12     | 6      | 0      | 0.231000                | -2.012000 | 5.807000 |
| 13     | 6      | 0      | 2.088000                | -2.935000 | 4.257000 |

|    |   |   |           |           |          |
|----|---|---|-----------|-----------|----------|
| 14 | 1 | 0 | 1.754000  | -3.803000 | 4.272000 |
| 15 | 6 | 0 | 3.229000  | -2.632000 | 3.544000 |
| 16 | 1 | 0 | 3.673000  | -3.304000 | 3.077000 |
| 17 | 6 | 0 | -1.121000 | -0.432000 | 7.145000 |
| 18 | 6 | 0 | -3.083000 | -0.669000 | 8.506000 |
| 19 | 1 | 0 | -3.767000 | -1.210000 | 8.831000 |
| 20 | 6 | 0 | -1.070000 | 0.945000  | 7.514000 |
| 21 | 6 | 0 | -3.035000 | 0.626000  | 8.894000 |
| 22 | 1 | 0 | -3.666000 | 0.955000  | 9.492000 |
| 23 | 6 | 0 | -2.026000 | 1.481000  | 8.392000 |
| 24 | 6 | 0 | -0.008000 | 2.983000  | 7.263000 |
| 25 | 1 | 0 | 0.664000  | 3.504000  | 6.889000 |
| 26 | 6 | 0 | -0.923000 | 3.593000  | 8.117000 |
| 27 | 1 | 0 | -0.863000 | 4.504000  | 8.291000 |
| 28 | 6 | 0 | -1.911000 | 2.850000  | 8.699000 |
| 29 | 1 | 0 | -2.505000 | 3.246000  | 9.294000 |
| 30 | 6 | 0 | -2.136000 | -1.228000 | 7.630000 |
| 31 | 1 | 0 | -2.194000 | -2.121000 | 7.382000 |
| 32 | 6 | 0 | 2.887000  | 3.047000  | 5.587000 |
| 33 | 6 | 0 | 3.801000  | 3.317000  | 6.641000 |
| 34 | 6 | 0 | 4.102000  | 4.672000  | 6.962000 |
| 35 | 6 | 0 | 3.444000  | 5.708000  | 6.270000 |
| 36 | 1 | 0 | 3.612000  | 6.593000  | 6.501000 |
| 37 | 6 | 0 | 2.573000  | 5.433000  | 5.277000 |

|    |   |   |           |          |          |
|----|---|---|-----------|----------|----------|
| 38 | 1 | 0 | 2.156000  | 6.126000 | 4.821000 |
| 39 | 6 | 0 | 2.290000  | 4.086000 | 4.926000 |
| 40 | 1 | 0 | 1.690000  | 3.910000 | 4.237000 |
| 41 | 7 | 0 | 4.341000  | 2.259000 | 7.324000 |
| 42 | 6 | 0 | 5.033000  | 4.918000 | 7.975000 |
| 43 | 1 | 0 | 5.266000  | 5.789000 | 8.202000 |
| 44 | 7 | 0 | -0.053000 | 1.692000 | 6.960000 |
| 45 | 6 | 0 | 5.195000  | 2.553000 | 8.289000 |
| 46 | 1 | 0 | 5.559000  | 1.850000 | 8.777000 |
| 47 | 6 | 0 | 5.589000  | 3.860000 | 8.627000 |
| 48 | 1 | 0 | 6.226000  | 4.003000 | 9.290000 |
| 49 | 1 | 0 | 4.101402  | 1.313434 | 7.103781 |

-----

**Table S5.** XYZ coordinates for **(1b)**

-----

| Center<br>Number | Atomic<br>Number | Atomic<br>Type | Coordinates (Angstroms) |           |          |
|------------------|------------------|----------------|-------------------------|-----------|----------|
|                  |                  |                | X                       | Y         | Z        |
| 1                | 28               | 0              | 1.102000                | 0.624000  | 5.869000 |
| 2                | 7                | 0              | 1.951000                | -0.671000 | 4.909000 |
| 3                | 7                | 0              | 2.551000                | 1.706000  | 5.241000 |
| 4                | 7                | 0              | -0.069000               | -0.755000 | 6.273000 |
| 5                | 8                | 0              | 4.450000                | 1.553000  | 3.904000 |
| 6                | 8                | 0              | -0.359000               | -3.068000 | 6.047000 |

|    |   |   |           |           |          |
|----|---|---|-----------|-----------|----------|
| 7  | 6 | 0 | 3.435000  | 1.073000  | 4.424000 |
| 8  | 6 | 0 | 1.454000  | -1.925000 | 4.945000 |
| 9  | 6 | 0 | 3.067000  | -0.360000 | 4.233000 |
| 10 | 6 | 0 | 3.718000  | -1.333000 | 3.516000 |
| 11 | 1 | 0 | 4.476000  | -1.125000 | 3.020000 |
| 12 | 6 | 0 | 0.231000  | -2.012000 | 5.807000 |
| 13 | 6 | 0 | 2.088000  | -2.935000 | 4.257000 |
| 14 | 1 | 0 | 1.754000  | -3.803000 | 4.272000 |
| 15 | 6 | 0 | 3.229000  | -2.632000 | 3.544000 |
| 16 | 1 | 0 | 3.673000  | -3.304000 | 3.077000 |
| 17 | 6 | 0 | -1.121000 | -0.432000 | 7.145000 |
| 18 | 6 | 0 | -3.083000 | -0.669000 | 8.506000 |
| 19 | 1 | 0 | -3.767000 | -1.210000 | 8.831000 |
| 20 | 6 | 0 | -1.070000 | 0.945000  | 7.514000 |
| 21 | 6 | 0 | -3.035000 | 0.626000  | 8.894000 |
| 22 | 1 | 0 | -3.666000 | 0.955000  | 9.492000 |
| 23 | 6 | 0 | -2.026000 | 1.481000  | 8.392000 |
| 24 | 6 | 0 | -0.008000 | 2.983000  | 7.263000 |
| 25 | 1 | 0 | 0.664000  | 3.504000  | 6.889000 |
| 26 | 6 | 0 | -0.923000 | 3.593000  | 8.117000 |
| 27 | 1 | 0 | -0.863000 | 4.504000  | 8.291000 |
| 28 | 6 | 0 | -1.911000 | 2.850000  | 8.699000 |
| 29 | 1 | 0 | -2.505000 | 3.246000  | 9.294000 |
| 30 | 6 | 0 | -2.136000 | -1.228000 | 7.630000 |



|    |   |   |           |           |          |
|----|---|---|-----------|-----------|----------|
| 31 | 1 | 0 | -2.194000 | -2.121000 | 7.382000 |
| 32 | 6 | 0 | 2.887000  | 3.047000  | 5.587000 |
| 33 | 6 | 0 | 3.801000  | 3.317000  | 6.641000 |
| 34 | 6 | 0 | 4.102000  | 4.672000  | 6.962000 |
| 35 | 6 | 0 | 3.444000  | 5.708000  | 6.270000 |
| 36 | 1 | 0 | 3.612000  | 6.593000  | 6.501000 |
| 37 | 6 | 0 | 2.573000  | 5.433000  | 5.277000 |
| 38 | 1 | 0 | 2.156000  | 6.126000  | 4.821000 |
| 39 | 6 | 0 | 2.290000  | 4.086000  | 4.926000 |
| 40 | 1 | 0 | 1.690000  | 3.910000  | 4.237000 |
| 41 | 7 | 0 | 4.341000  | 2.259000  | 7.324000 |
| 42 | 6 | 0 | 5.033000  | 4.918000  | 7.975000 |
| 43 | 1 | 0 | 5.266000  | 5.789000  | 8.202000 |
| 44 | 7 | 0 | -0.053000 | 1.692000  | 6.960000 |
| 45 | 6 | 0 | 5.195000  | 2.553000  | 8.289000 |
| 46 | 1 | 0 | 5.559000  | 1.850000  | 8.777000 |
| 47 | 6 | 0 | 5.589000  | 3.860000  | 8.627000 |
| 48 | 1 | 0 | 6.226000  | 4.003000  | 9.290000 |
| 49 | 1 | 0 | 4.101402  | 1.313434  | 7.103781 |
| 50 | 1 | 0 | 1.893229  | 0.481124  | 7.075666 |

-----

**Table S6.** XYZ coordinates for (**1b'**)

-----

| Center | Atomic | Atomic | Coordinates (Angstroms) |  |  |
|--------|--------|--------|-------------------------|--|--|
|--------|--------|--------|-------------------------|--|--|

| Number | Number | Type | X         | Y         | Z        |
|--------|--------|------|-----------|-----------|----------|
| 1      | 28     | 0    | 1.102000  | 0.624000  | 5.869000 |
| 2      | 7      | 0    | 1.951000  | -0.671000 | 4.909000 |
| 3      | 7      | 0    | 2.551000  | 1.706000  | 5.241000 |
| 4      | 7      | 0    | -0.069000 | -0.755000 | 6.273000 |
| 5      | 8      | 0    | 4.450000  | 1.553000  | 3.904000 |
| 6      | 8      | 0    | -0.359000 | -3.068000 | 6.047000 |
| 7      | 6      | 0    | 3.435000  | 1.073000  | 4.424000 |
| 8      | 6      | 0    | 1.454000  | -1.925000 | 4.945000 |
| 9      | 6      | 0    | 3.067000  | -0.360000 | 4.233000 |
| 10     | 6      | 0    | 3.718000  | -1.333000 | 3.516000 |
| 11     | 1      | 0    | 4.476000  | -1.125000 | 3.020000 |
| 12     | 6      | 0    | 0.231000  | -2.012000 | 5.807000 |
| 13     | 6      | 0    | 2.088000  | -2.935000 | 4.257000 |
| 14     | 1      | 0    | 1.754000  | -3.803000 | 4.272000 |
| 15     | 6      | 0    | 3.229000  | -2.632000 | 3.544000 |
| 16     | 1      | 0    | 3.673000  | -3.304000 | 3.077000 |
| 17     | 6      | 0    | -1.121000 | -0.432000 | 7.145000 |
| 18     | 6      | 0    | -3.083000 | -0.669000 | 8.506000 |
| 19     | 1      | 0    | -3.767000 | -1.210000 | 8.831000 |
| 20     | 6      | 0    | -1.070000 | 0.945000  | 7.514000 |
| 21     | 6      | 0    | -3.035000 | 0.626000  | 8.894000 |
| 22     | 1      | 0    | -3.666000 | 0.955000  | 9.492000 |

|    |   |   |           |           |          |
|----|---|---|-----------|-----------|----------|
| 23 | 6 | 0 | -2.026000 | 1.481000  | 8.392000 |
| 24 | 6 | 0 | -0.008000 | 2.983000  | 7.263000 |
| 25 | 1 | 0 | 0.664000  | 3.504000  | 6.889000 |
| 26 | 6 | 0 | -0.923000 | 3.593000  | 8.117000 |
| 27 | 1 | 0 | -0.863000 | 4.504000  | 8.291000 |
| 28 | 6 | 0 | -1.911000 | 2.850000  | 8.699000 |
| 29 | 1 | 0 | -2.505000 | 3.246000  | 9.294000 |
| 30 | 6 | 0 | -2.136000 | -1.228000 | 7.630000 |
| 31 | 1 | 0 | -2.194000 | -2.121000 | 7.382000 |
| 32 | 6 | 0 | 2.887000  | 3.047000  | 5.587000 |
| 33 | 6 | 0 | 3.801000  | 3.317000  | 6.641000 |
| 34 | 6 | 0 | 4.102000  | 4.672000  | 6.962000 |
| 35 | 6 | 0 | 3.444000  | 5.708000  | 6.270000 |
| 36 | 1 | 0 | 3.612000  | 6.593000  | 6.501000 |
| 37 | 6 | 0 | 2.573000  | 5.433000  | 5.277000 |
| 38 | 1 | 0 | 2.156000  | 6.126000  | 4.821000 |
| 39 | 6 | 0 | 2.290000  | 4.086000  | 4.926000 |
| 40 | 1 | 0 | 1.690000  | 3.910000  | 4.237000 |
| 41 | 7 | 0 | 4.341000  | 2.259000  | 7.324000 |
| 42 | 6 | 0 | 5.033000  | 4.918000  | 7.975000 |
| 43 | 1 | 0 | 5.266000  | 5.789000  | 8.202000 |
| 44 | 7 | 0 | -0.053000 | 1.692000  | 6.960000 |
| 45 | 6 | 0 | 5.195000  | 2.553000  | 8.289000 |
| 46 | 1 | 0 | 5.559000  | 1.850000  | 8.777000 |

|    |   |   |          |          |          |
|----|---|---|----------|----------|----------|
| 47 | 6 | 0 | 5.589000 | 3.860000 | 8.627000 |
| 48 | 1 | 0 | 6.226000 | 4.003000 | 9.290000 |
| 49 | 1 | 0 | 4.101402 | 1.313434 | 7.103781 |
| 50 | 1 | 0 | 0.340426 | 1.161510 | 4.758330 |

-----

**Table S7.** XYZ coordinates for (**1c**)

-----

| Center<br>Number | Atomic<br>Number | Atomic<br>Type | Coordinates (Angstroms) |           |          |
|------------------|------------------|----------------|-------------------------|-----------|----------|
|                  |                  |                | X                       | Y         | Z        |
| 1                | 28               | 0              | 1.102000                | 0.624000  | 5.869000 |
| 2                | 7                | 0              | 1.951000                | -0.671000 | 4.909000 |
| 3                | 7                | 0              | 2.551000                | 1.706000  | 5.241000 |
| 4                | 7                | 0              | -0.069000               | -0.755000 | 6.273000 |
| 5                | 8                | 0              | 4.450000                | 1.553000  | 3.904000 |
| 6                | 8                | 0              | -0.359000               | -3.068000 | 6.047000 |
| 7                | 6                | 0              | 3.435000                | 1.073000  | 4.424000 |
| 8                | 6                | 0              | 1.454000                | -1.925000 | 4.945000 |
| 9                | 6                | 0              | 3.067000                | -0.360000 | 4.233000 |
| 10               | 6                | 0              | 3.718000                | -1.333000 | 3.516000 |
| 11               | 1                | 0              | 4.476000                | -1.125000 | 3.020000 |
| 12               | 6                | 0              | 0.231000                | -2.012000 | 5.807000 |
| 13               | 6                | 0              | 2.088000                | -2.935000 | 4.257000 |
| 14               | 1                | 0              | 1.754000                | -3.803000 | 4.272000 |

|    |   |   |           |           |          |
|----|---|---|-----------|-----------|----------|
| 15 | 6 | 0 | 3.229000  | -2.632000 | 3.544000 |
| 16 | 1 | 0 | 3.673000  | -3.304000 | 3.077000 |
| 17 | 6 | 0 | -1.121000 | -0.432000 | 7.145000 |
| 18 | 6 | 0 | -3.083000 | -0.669000 | 8.506000 |
| 19 | 1 | 0 | -3.767000 | -1.210000 | 8.831000 |
| 20 | 6 | 0 | -1.070000 | 0.945000  | 7.514000 |
| 21 | 6 | 0 | -3.035000 | 0.626000  | 8.894000 |
| 22 | 1 | 0 | -3.666000 | 0.955000  | 9.492000 |
| 23 | 6 | 0 | -2.026000 | 1.481000  | 8.392000 |
| 24 | 6 | 0 | -0.008000 | 2.983000  | 7.263000 |
| 25 | 1 | 0 | 0.664000  | 3.504000  | 6.889000 |
| 26 | 6 | 0 | -0.923000 | 3.593000  | 8.117000 |
| 27 | 1 | 0 | -0.863000 | 4.504000  | 8.291000 |
| 28 | 6 | 0 | -1.911000 | 2.850000  | 8.699000 |
| 29 | 1 | 0 | -2.505000 | 3.246000  | 9.294000 |
| 30 | 6 | 0 | -2.136000 | -1.228000 | 7.630000 |
| 31 | 1 | 0 | -2.194000 | -2.121000 | 7.382000 |
| 32 | 6 | 0 | 2.887000  | 3.047000  | 5.587000 |
| 33 | 6 | 0 | 3.801000  | 3.317000  | 6.641000 |
| 34 | 6 | 0 | 4.102000  | 4.672000  | 6.962000 |
| 35 | 6 | 0 | 3.444000  | 5.708000  | 6.270000 |
| 36 | 1 | 0 | 3.612000  | 6.593000  | 6.501000 |
| 37 | 6 | 0 | 2.573000  | 5.433000  | 5.277000 |
| 38 | 1 | 0 | 2.156000  | 6.126000  | 4.821000 |

|    |   |   |           |          |          |
|----|---|---|-----------|----------|----------|
| 39 | 6 | 0 | 2.290000  | 4.086000 | 4.926000 |
| 40 | 1 | 0 | 1.690000  | 3.910000 | 4.237000 |
| 41 | 7 | 0 | 4.341000  | 2.259000 | 7.324000 |
| 42 | 6 | 0 | 5.033000  | 4.918000 | 7.975000 |
| 43 | 1 | 0 | 5.266000  | 5.789000 | 8.202000 |
| 44 | 7 | 0 | -0.053000 | 1.692000 | 6.960000 |
| 45 | 6 | 0 | 5.195000  | 2.553000 | 8.289000 |
| 46 | 1 | 0 | 5.559000  | 1.850000 | 8.777000 |
| 47 | 6 | 0 | 5.589000  | 3.860000 | 8.627000 |
| 48 | 1 | 0 | 6.226000  | 4.003000 | 9.290000 |
| 49 | 1 | 0 | 3.699068  | 1.161785 | 7.098658 |
| 50 | 1 | 0 | 2.295563  | 0.632773 | 7.080789 |

-----

**Table S8.** XYZ coordinates for (**1c'**)

-----

| Center | Atomic | Atomic | Coordinates (Angstroms) |           |          |
|--------|--------|--------|-------------------------|-----------|----------|
| Number | Number | Type   | X                       | Y         | Z        |
| 1      | 28     | 0      | 1.102000                | 0.624000  | 5.869000 |
| 2      | 7      | 0      | 1.951000                | -0.671000 | 4.909000 |
| 3      | 7      | 0      | 2.551000                | 1.706000  | 5.241000 |
| 4      | 7      | 0      | -0.069000               | -0.755000 | 6.273000 |
| 5      | 8      | 0      | 4.450000                | 1.553000  | 3.904000 |
| 6      | 8      | 0      | -0.359000               | -3.068000 | 6.047000 |

|    |   |   |           |           |          |
|----|---|---|-----------|-----------|----------|
| 7  | 6 | 0 | 3.435000  | 1.073000  | 4.424000 |
| 8  | 6 | 0 | 1.454000  | -1.925000 | 4.945000 |
| 9  | 6 | 0 | 3.067000  | -0.360000 | 4.233000 |
| 10 | 6 | 0 | 3.718000  | -1.333000 | 3.516000 |
| 11 | 1 | 0 | 4.476000  | -1.125000 | 3.020000 |
| 12 | 6 | 0 | 0.231000  | -2.012000 | 5.807000 |
| 13 | 6 | 0 | 2.088000  | -2.935000 | 4.257000 |
| 14 | 1 | 0 | 1.754000  | -3.803000 | 4.272000 |
| 15 | 6 | 0 | 3.229000  | -2.632000 | 3.544000 |
| 16 | 1 | 0 | 3.673000  | -3.304000 | 3.077000 |
| 17 | 6 | 0 | -1.121000 | -0.432000 | 7.145000 |
| 18 | 6 | 0 | -3.083000 | -0.669000 | 8.506000 |
| 19 | 1 | 0 | -3.767000 | -1.210000 | 8.831000 |
| 20 | 6 | 0 | -1.070000 | 0.945000  | 7.514000 |
| 21 | 6 | 0 | -3.035000 | 0.626000  | 8.894000 |
| 22 | 1 | 0 | -3.666000 | 0.955000  | 9.492000 |
| 23 | 6 | 0 | -2.026000 | 1.481000  | 8.392000 |
| 24 | 6 | 0 | -0.008000 | 2.983000  | 7.263000 |
| 25 | 1 | 0 | 0.664000  | 3.504000  | 6.889000 |
| 26 | 6 | 0 | -0.923000 | 3.593000  | 8.117000 |
| 27 | 1 | 0 | -0.863000 | 4.504000  | 8.291000 |
| 28 | 6 | 0 | -1.911000 | 2.850000  | 8.699000 |
| 29 | 1 | 0 | -2.505000 | 3.246000  | 9.294000 |
| 30 | 6 | 0 | -2.136000 | -1.228000 | 7.630000 |

|    |   |   |           |           |          |
|----|---|---|-----------|-----------|----------|
| 31 | 1 | 0 | -2.194000 | -2.121000 | 7.382000 |
| 32 | 6 | 0 | 2.887000  | 3.047000  | 5.587000 |
| 33 | 6 | 0 | 3.801000  | 3.317000  | 6.641000 |
| 34 | 6 | 0 | 4.102000  | 4.672000  | 6.962000 |
| 35 | 6 | 0 | 3.444000  | 5.708000  | 6.270000 |
| 36 | 1 | 0 | 3.612000  | 6.593000  | 6.501000 |
| 37 | 6 | 0 | 2.573000  | 5.433000  | 5.277000 |
| 38 | 1 | 0 | 2.156000  | 6.126000  | 4.821000 |
| 39 | 6 | 0 | 2.290000  | 4.086000  | 4.926000 |
| 40 | 1 | 0 | 1.690000  | 3.910000  | 4.237000 |
| 41 | 7 | 0 | 4.341000  | 2.259000  | 7.324000 |
| 42 | 6 | 0 | 5.033000  | 4.918000  | 7.975000 |
| 43 | 1 | 0 | 5.266000  | 5.789000  | 8.202000 |
| 44 | 7 | 0 | -0.053000 | 1.692000  | 6.960000 |
| 45 | 6 | 0 | 5.195000  | 2.553000  | 8.289000 |
| 46 | 1 | 0 | 5.559000  | 1.850000  | 8.777000 |
| 47 | 6 | 0 | 5.589000  | 3.860000  | 8.627000 |
| 48 | 1 | 0 | 6.226000  | 4.003000  | 9.290000 |
| 49 | 1 | 0 | 4.101402  | 1.313434  | 7.103781 |
| 50 | 1 | 0 | 0.340426  | 1.161510  | 4.758330 |

-----



**Table S9.** XYZ coordinates for (TS1)

---

| Center | Atomic | Atomic | Coordinates (Angstroms) |           |           |
|--------|--------|--------|-------------------------|-----------|-----------|
| Number | Number | Type   | X                       | Y         | Z         |
| 1      | 28     | 0      | 0.676501                | 0.370518  | -0.318562 |
| 2      | 7      | 0      | 0.942547                | 2.169326  | -0.204829 |
| 3      | 7      | 0      | -1.133701               | 0.899165  | -0.647816 |
| 4      | 7      | 0      | 2.487884                | 0.302569  | 0.069218  |
| 5      | 8      | 0      | -2.426469               | 2.823458  | -0.855251 |
| 6      | 8      | 0      | 4.300223                | 1.643301  | 0.704048  |
| 7      | 6      | 0      | -1.349745               | 2.241672  | -0.672999 |
| 8      | 6      | 0      | 2.173220                | 2.615612  | 0.122421  |
| 9      | 6      | 0      | -0.093294               | 2.998551  | -0.401230 |
| 10     | 6      | 0      | 0.097324                | 4.354778  | -0.306715 |
| 11     | 1      | 0      | -0.605011               | 4.941613  | -0.468564 |
| 12     | 6      | 0      | 3.135020                | 1.485458  | 0.332265  |
| 13     | 6      | 0      | 2.402608                | 3.967267  | 0.248161  |
| 14     | 1      | 0      | 3.247001                | 4.287540  | 0.470941  |
| 15     | 6      | 0      | 1.353373                | 4.836788  | 0.035796  |
| 16     | 1      | 0      | 1.489837                | 5.753766  | 0.121451  |
| 17     | 6      | 0      | 3.041822                | -0.981635 | 0.193278  |
| 18     | 6      | 0      | 4.652026                | -2.724210 | 0.551901  |
| 19     | 1      | 0      | 5.528392                | -2.972693 | 0.742693  |

---

|    |   |   |           |           |           |
|----|---|---|-----------|-----------|-----------|
| 20 | 6 | 0 | 2.056688  | -1.984920 | -0.047183 |
| 21 | 6 | 0 | 3.726679  | -3.691858 | 0.358870  |
| 22 | 1 | 0 | 3.966845  | -4.586250 | 0.438799  |
| 23 | 6 | 0 | 2.393623  | -3.345680 | 0.036018  |
| 24 | 6 | 0 | -0.131146 | -2.456741 | -0.626020 |
| 25 | 1 | 0 | -0.986352 | -2.174190 | -0.853373 |
| 26 | 6 | 0 | 0.124182  | -3.824522 | -0.574820 |
| 27 | 1 | 0 | -0.548363 | -4.432512 | -0.779342 |
| 28 | 6 | 0 | 1.366426  | -4.272455 | -0.223961 |
| 29 | 1 | 0 | 1.533318  | -5.184301 | -0.157929 |
| 30 | 6 | 0 | 4.337618  | -1.355989 | 0.475834  |
| 31 | 1 | 0 | 4.994120  | -0.713960 | 0.614114  |
| 32 | 6 | 0 | -2.298794 | 0.087762  | -0.770608 |
| 33 | 6 | 0 | -3.112735 | -0.188888 | 0.360840  |
| 34 | 6 | 0 | -4.263178 | -1.013132 | 0.197225  |
| 35 | 6 | 0 | -4.532137 | -1.580700 | -1.063985 |
| 36 | 1 | 0 | -5.262429 | -2.147371 | -1.165809 |
| 37 | 6 | 0 | -3.743841 | -1.313321 | -2.125782 |
| 38 | 1 | 0 | -3.940160 | -1.684280 | -2.953986 |
| 39 | 6 | 0 | -2.612719 | -0.466220 | -1.981974 |
| 40 | 1 | 0 | -2.079187 | -0.287056 | -2.722879 |
| 41 | 7 | 0 | -2.744086 | 0.331961  | 1.573386  |
| 42 | 6 | 0 | -5.073747 | -1.242081 | 1.312576  |
| 43 | 1 | 0 | -5.841016 | -1.762299 | 1.240950  |

|    |   |   |           |           |           |
|----|---|---|-----------|-----------|-----------|
| 44 | 7 | 0 | 0.791646  | -1.539860 | -0.364681 |
| 45 | 6 | 0 | -3.534207 | 0.060469  | 2.597583  |
| 46 | 1 | 0 | -3.292019 | 0.389289  | 3.433090  |
| 47 | 6 | 0 | -4.717441 | -0.694159 | 2.506909  |
| 48 | 1 | 0 | -5.255255 | -0.818112 | 3.256027  |
| 49 | 1 | 0 | -1.525982 | 0.759592  | 1.563916  |
| 50 | 1 | 0 | -0.151591 | 0.309442  | 1.165902  |

-----

**Table S10.** XYZ coordinates for (TS2)

-----

| Center<br>Number | Atomic<br>Number | Atomic<br>Type | Coordinates (Angstroms) |           |           |
|------------------|------------------|----------------|-------------------------|-----------|-----------|
|                  |                  |                | X                       | Y         | Z         |
| 1                | 28               | 0              | 0.691363                | 0.360175  | -0.227619 |
| 2                | 7                | 0              | 1.368757                | 2.042507  | -0.131182 |
| 3                | 7                | 0              | -0.947419               | 1.178892  | -0.641017 |
| 4                | 7                | 0              | 2.456866                | -0.111129 | 0.071065  |
| 5                | 8                | 0              | -1.917249               | 3.345616  | -0.760537 |
| 6                | 8                | 0              | 4.626398                | 0.763576  | 0.459586  |
| 7                | 6                | 0              | -0.931242               | 2.533482  | -0.583319 |
| 8                | 6                | 0              | 2.696803                | 2.237096  | 0.108116  |
| 9                | 6                | 0              | 0.461464                | 3.038047  | -0.296043 |
| 10               | 6                | 0              | 0.894251                | 4.369162  | -0.200108 |
| 11               | 1                | 0              | 0.179832                | 5.171066  | -0.321029 |

|    |   |   |           |           |           |
|----|---|---|-----------|-----------|-----------|
| 12 | 6 | 0 | 3.415010  | 0.893754  | 0.234648  |
| 13 | 6 | 0 | 3.177266  | 3.534534  | 0.206039  |
| 14 | 1 | 0 | 4.229154  | 3.711337  | 0.392228  |
| 15 | 6 | 0 | 2.259727  | 4.610966  | 0.054108  |
| 16 | 1 | 0 | 2.620936  | 5.637901  | 0.133753  |
| 17 | 6 | 0 | 2.704490  | -1.498431 | 0.112403  |
| 18 | 6 | 0 | 3.901070  | -3.603389 | 0.312186  |
| 19 | 1 | 0 | 4.845156  | -4.118705 | 0.474069  |
| 20 | 6 | 0 | 1.493205  | -2.250111 | -0.105269 |
| 21 | 6 | 0 | 2.743994  | -4.346932 | 0.108427  |
| 22 | 1 | 0 | 2.777208  | -5.428470 | 0.112123  |
| 23 | 6 | 0 | 1.502145  | -3.682608 | -0.106962 |
| 24 | 6 | 0 | -0.832166 | -2.174966 | -0.512964 |
| 25 | 1 | 0 | -1.742671 | -1.585990 | -0.679182 |
| 26 | 6 | 0 | -0.895031 | -3.587638 | -0.526468 |
| 27 | 1 | 0 | -1.854297 | -4.068389 | -0.698123 |
| 28 | 6 | 0 | 0.257965  | -4.340031 | -0.326365 |
| 29 | 1 | 0 | 0.216289  | -5.427483 | -0.335115 |
| 30 | 6 | 0 | 3.900940  | -2.177154 | 0.316684  |
| 31 | 1 | 0 | 4.823830  | -1.622424 | 0.476704  |
| 32 | 6 | 0 | -2.233436 | 0.467440  | -0.828710 |
| 33 | 6 | 0 | -2.988201 | 0.192155  | 0.328895  |
| 34 | 6 | 0 | -4.267174 | -0.478576 | 0.214099  |
| 35 | 6 | 0 | -4.731537 | -0.841704 | -1.081943 |

|    |   |   |           |           |           |
|----|---|---|-----------|-----------|-----------|
| 36 | 1 | 0 | -5.691164 | -1.339256 | -1.167895 |
| 37 | 6 | 0 | -3.967241 | -0.559860 | -2.216825 |
| 38 | 1 | 0 | -4.332016 | -0.828455 | -3.207697 |
| 39 | 6 | 0 | -2.704666 | 0.106178  | -2.084437 |
| 40 | 1 | 0 | -2.100195 | 0.351910  | -2.953658 |
| 41 | 7 | 0 | -2.451775 | 0.564795  | 1.478518  |
| 42 | 6 | 0 | -4.951864 | -0.705644 | 1.431325  |
| 43 | 1 | 0 | -5.917601 | -1.202877 | 1.418769  |
| 44 | 7 | 0 | 0.322533  | -1.506083 | -0.309835 |
| 45 | 6 | 0 | -3.108015 | 0.333588  | 2.654580  |
| 46 | 1 | 0 | -2.611939 | 0.651093  | 3.580803  |
| 47 | 6 | 0 | -4.369677 | -0.291281 | 2.655776  |
| 48 | 1 | 0 | -4.875663 | -0.455578 | 3.607191  |
| 49 | 1 | 0 | 0.899714  | 1.025266  | 2.020479  |
| 50 | 1 | 0 | 1.690868  | 0.719272  | 3.447443  |

-----

**Table S11.** Selected bond distances (Å) and angles (°) in optimized Ni(DQPD)·H<sub>2</sub>O.

| <b>Bond distances</b> | <b>Distances (Å)</b> | <b>Bond Angle</b> | <b>Angles (°)</b> |
|-----------------------|----------------------|-------------------|-------------------|
| Ni–N1                 | 1.915(3)             | N1–Ni–N2          | 82.9(1)           |
| Ni–N2                 | 1.822(2)             | N1–Ni–N3          | 165.9(1)          |
| Ni–N3                 | 1.854(3)             | N1–Ni–N4          | 109.2(1)          |
| Ni–N4                 | 1.914(4)             | N2–Ni–N3          | 83.1(1)           |
|                       |                      | N2–Ni–N4          | 167.9(2)          |
|                       |                      | N3–Ni–N4          | 84.8(1)           |

**Table S12.** Selected bond distances (Å) and angles (°) in Ni(DQPD).

| <b>Bond distances</b> | <b>Distances (Å)</b> | <b>Bond Angle</b> | <b>Angles (°)</b> |
|-----------------------|----------------------|-------------------|-------------------|
| Ni–N1                 | 1.944                | N1–Ni–N2          | 83.0              |
| Ni–N2                 | 1.851                | N1–Ni–N3          | 165.8             |
| Ni–N3                 | 1.891                | N1–Ni–N4          | 109.1             |
| Ni–N4                 | 1.940                | N2–Ni–N3          | 82.8              |
|                       |                      | N2–Ni–N4          | 167.9             |
|                       |                      | N3–Ni–N4          | 85.1              |

**Table S13.** Selected bond distances (Å) and angles (°) in optimized **1**.

| <b>Bond distances</b> | <b>Distances (Å)</b> | <b>Bond Angle</b> | <b>Angles (°)</b> |
|-----------------------|----------------------|-------------------|-------------------|
| Ni–N1                 | 1.959                | N1–Ni–N2          | 82.8              |
| Ni–N2                 | 1.854                | N1–Ni–N3          | 165.5             |
| Ni–N3                 | 1.887                | N1–Ni–N4          | 109.3             |
| Ni–N4                 | 1.939                | N2–Ni–N3          | 82.9              |
|                       |                      | N2–Ni–N4          | 167.8             |
|                       |                      | N3–Ni–N4          | 85.1              |

**Table S14.** Selected bond distances (Å) and angles (°) in optimized **1a**.

| <b>Bond distances</b> | <b>Distances (Å)</b> | <b>Bond Angle</b> | <b>Angles (°)</b> |
|-----------------------|----------------------|-------------------|-------------------|
| Ni–N1                 | 1.945                | N1–Ni–N2          | 83.1              |
| Ni–N2                 | 1.851                | N1–Ni–N3          | 166.0             |
| Ni–N3                 | 1.893                | N1–Ni–N4          | 108.9             |
| Ni–N4                 | 1.939                | N2–Ni–N3          | 82.9              |
|                       |                      | N2–Ni–N4          | 167.9             |
|                       |                      | N3–Ni–N4          | 85.1              |

**Table S15.** Selected bond distances (Å) and angles (°) in optimized **1b**.

| <b>Bond distances</b> | <b>Distances (Å)</b> | <b>Bond Angle</b> | <b>Angles (°)</b> |
|-----------------------|----------------------|-------------------|-------------------|
| Ni–N1                 | 1.942                | N1–Ni–N2          | 83.0              |
| Ni–N2                 | 1.890                | N1–Ni–N3          | 165.5             |
| Ni–N3                 | 1.874                | N1–Ni–N4          | 108.9             |
| Ni–N4                 | 1.998                | N2–Ni–N3          | 82.6              |
| Ni–H                  | 1.619                | N2–Ni–N4          | 159.6             |
|                       |                      | N3–Ni–N4          | 84.4              |

**Table S16.** Selected bond distances (Å) and angles (°) in optimized **1c**.

| <b>Bond distances</b> | <b>Distances (Å)</b> | <b>Bond Angle</b> | <b>Angles (°)</b> |
|-----------------------|----------------------|-------------------|-------------------|
| Ni–N1                 | 1.933                | N1–Ni–N2          | 83.3              |
| Ni–N2                 | 1.849                | N1–Ni–N3          | 166.1             |
| Ni–N3                 | 1.889                | N1–Ni–N4          | 109.0             |
| Ni–N4                 | 1.941                | N2–Ni–N3          | 82.8              |
| H–H                   | 0.747                | N2–Ni–N4          | 167.8             |
|                       |                      | N3–Ni–N4          | 84.9              |

**Table S17.** Selected bond distances (Å) and angles (°) in optimized **2a**.

| <b>Bond distances</b> | <b>Distances (Å)</b> | <b>Bond Angle</b> | <b>Angles (°)</b> |
|-----------------------|----------------------|-------------------|-------------------|
| Ni-N1                 | 1.973                | N1-Ni-N2          | 81.1              |
| Ni-N2                 | 1.977                | N1-Ni-N3          | 161.2             |
| Ni-N3                 | 1.974                | N1-Ni-N4          | 116.5             |
| Ni-N4                 | 2.070                | N2-Ni-N3          | 80.3              |
| Ni-H                  | 1.450                | N2-Ni-N4          | 161.6             |
|                       |                      | N3-Ni-N4          | 82.3              |

**Table S18.** Selected bond distances (Å) and angles (°) in the transition state.

| <b>Bond distances</b> | <b>Distances (Å)</b> | <b>Bond Angle</b> | <b>Angles (°)</b> |
|-----------------------|----------------------|-------------------|-------------------|
| Ni-N1                 | 1.960                | N1-Ni-N2          | 83.2              |
| Ni-N2                 | 1.865                | N1-Ni-N3          | 164.8             |
| Ni-N3                 | 1.902                | N1-Ni-N4          | 108.3             |
| Ni-N4                 | 2.199                | N2-Ni-N3          | 82.4              |
| Ni-H                  | 1.651                | N2-Ni-N4          | 139.7             |
| H-H                   | 1.318                | N3-Ni-N4          | 80.4              |
